# Supplementary material for: Chronic Stress-Induced Depression and Anxiety Priming Modulated by Gut-Brain-Axis Immunity
Source: PubMed Central journal article supplement (PMC8264434; doi:10.3389/fimmu.2021.670500), 2021-06-24
Supplement: DataSheet_1.pdf [file DataSheet_1.pdf]

## Supplementary Information

### Figures

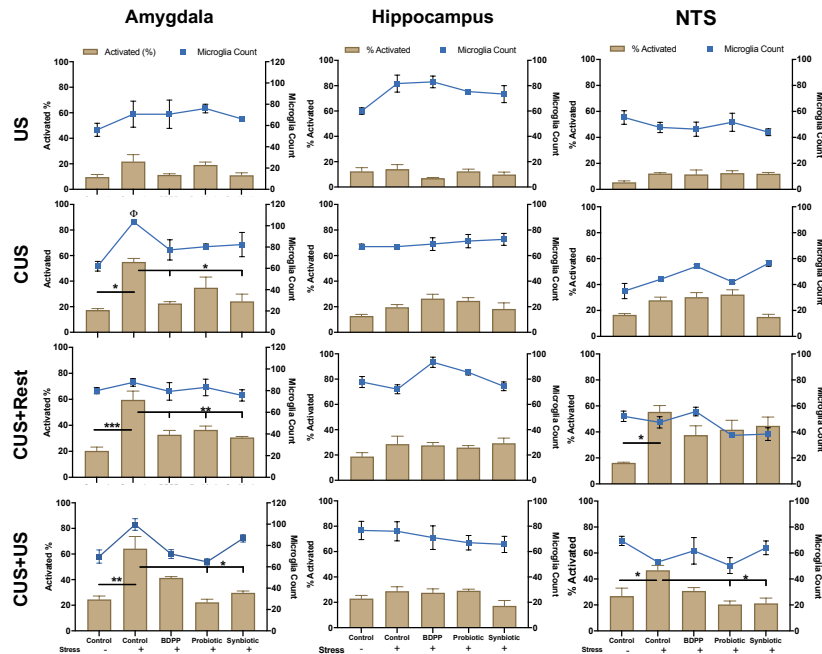

**Supplementary Figure 1: Microglia activation in limbic brain regions during the CUS protocol.**

Microglia activation was assessed as the percentage of surface area covered by the activation marker CD68 compared to the total area stained with Iba1 (brown columns, left axis). Microglia count in each frame is also displayed (blue line, right axis). Measures were taken at all timepoints including US, CUS, CUS+Rest and CUS+US. Significance ( $n = 3$ , +/- SEM) was determined with a one-way ANOVA and Tukey's post-hoc analyses and marked as \* $p < 0.05$ , \*\* $p < 0.01$ , \*\*\* $p < 0.0001$ .

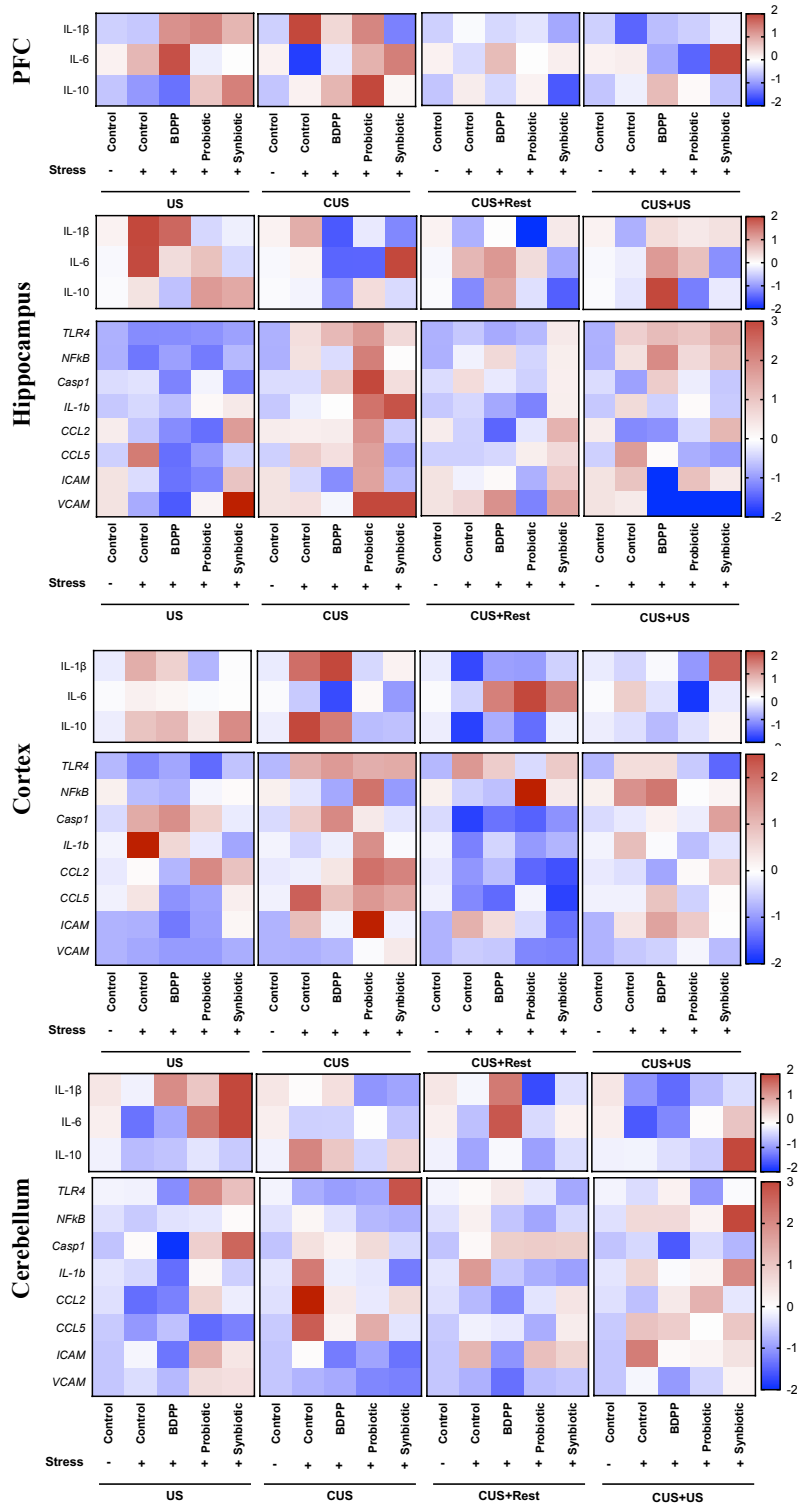

**Supplementary Figure 2: Gut microbiota altering substances modulate gene and cytokine expression of immunological factors during chronic and recurrent stress.** Gene and cytokine expression in the prefrontal cortex (PFC), hippocampus, cortex and cerebellum is outlined as the z-score of relative expression normalized across all timepoints for a

particular gene or cytokine. Note that each instance is a ratio of stressed vs. non-stressed for each of the respective treatment group. For each group,  $n = 6$  individuals are shown.

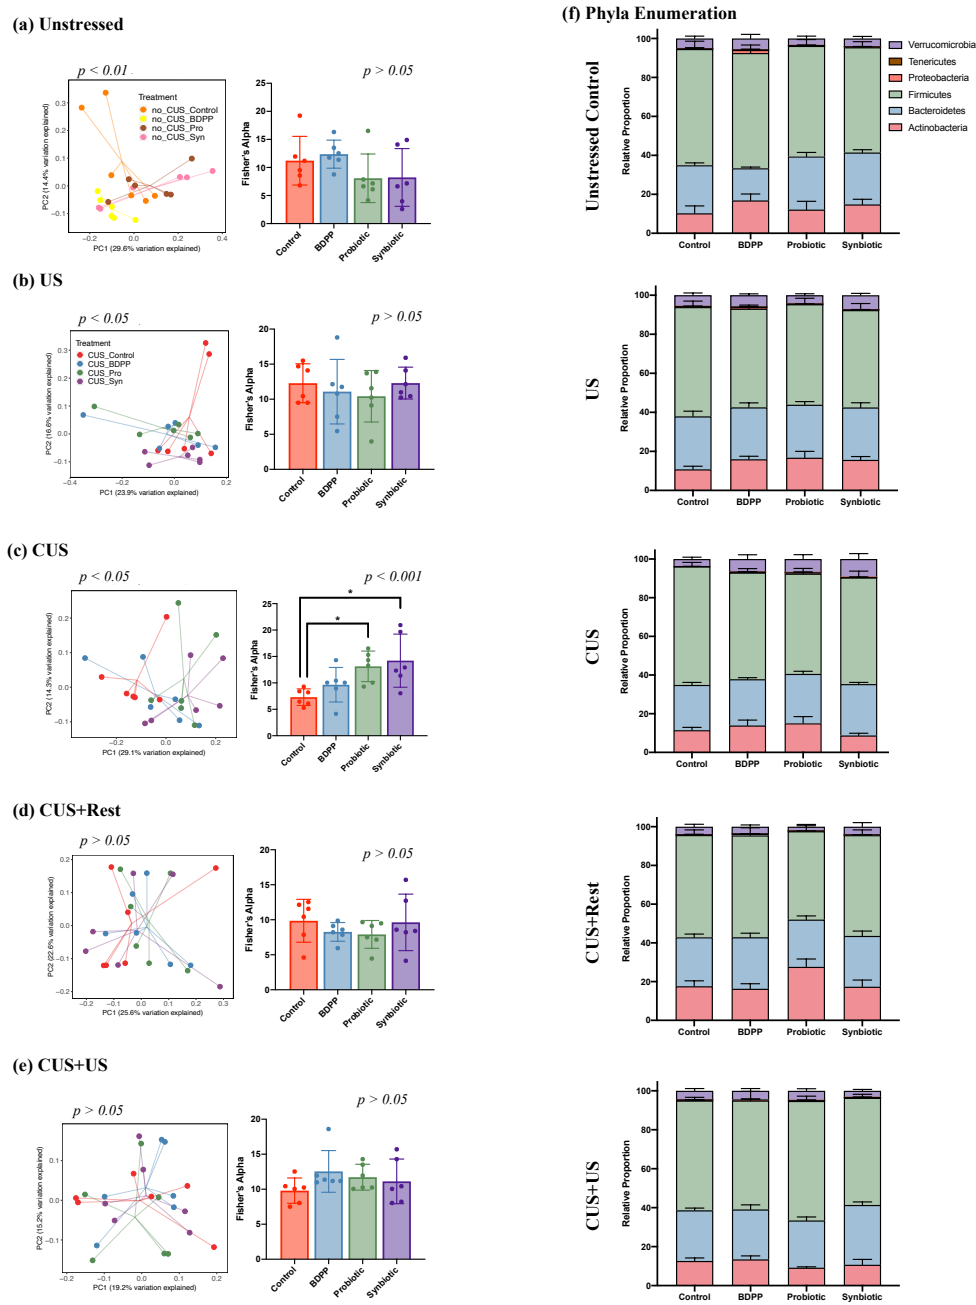

### Supplementary Figure 3: Gut microbiome variations in response the CUS protocol.

Alpha diversity (Fisher's alpha) and beta diversity (unweighted UniFrac PCoA plots) show the variations in the gut microbiome with respect to the CUS protocol within a treatment group for **(a)** CUS control vs. stressed, **(b)** Control, **(c)** BDPP, **(d)** Probiotic and **(e)** Synbiotic. **(f)** Enumeration of the main phyla across treatment at the respective timepoints is also shown. Each group contains  $n = 6$  individuals +/- SEM with significance determined with one-way ANOVA \* $p < 0.05$  and \*\* $p < 0.01$ .

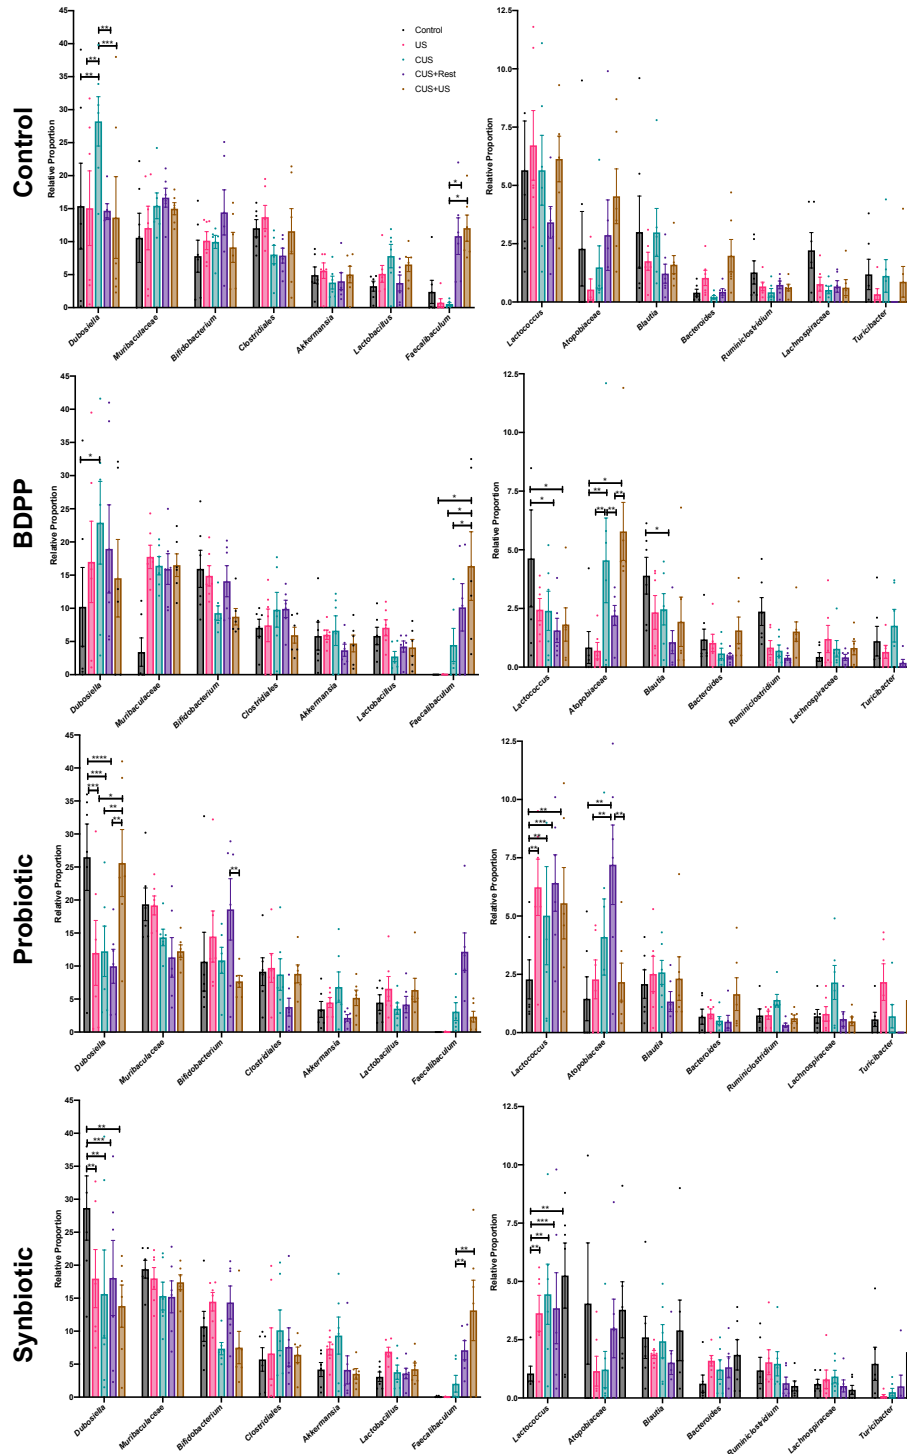

**Supplementary Figure 4: Gut microbiome genera variations with respect to time point during chronic and recurrent stress.** 16S *V4* sequencing of gut microbiome genera of stressed mice only during the CUS protocol are shown with variations with respect to timepoint during the CUS protocol for the respective treatments. Each group represents  $n = 6$  individuals  $\pm$  SEM with significance determined with a one-way ANOVA and Tukey's post-hoc analysis where \* $p < 0.05$ , \*\* $p < 0.01$  and \*\*\* $p < 0.001$ .

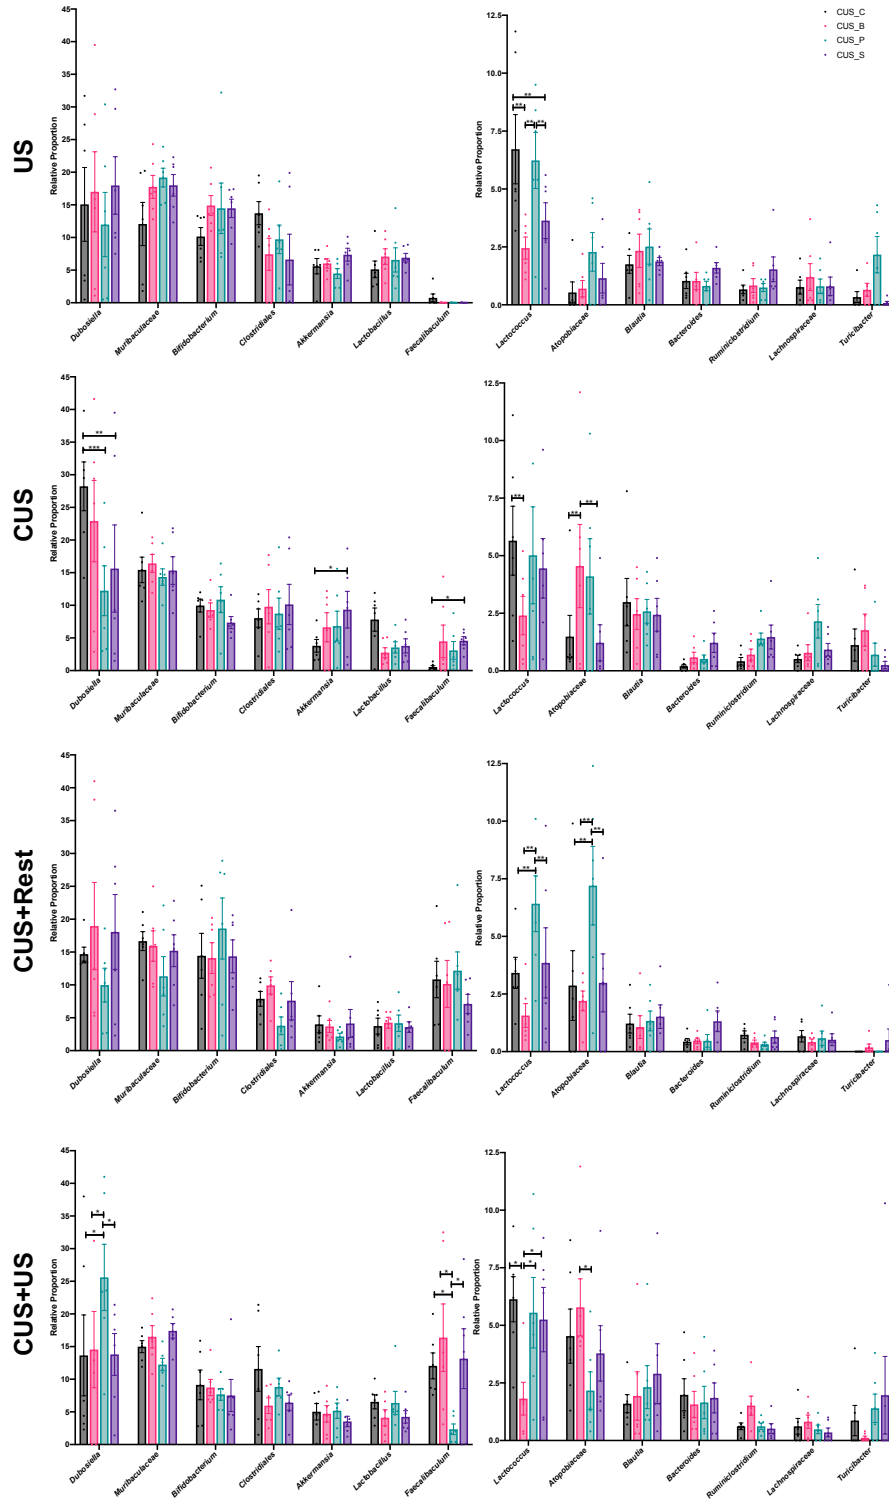

**Supplementary Figure 5: Gut microbiome genera variations with respect to treatment during chronic and recurrent stress.** 16S *V4* sequencing of gut microbiome genera of stressed mice only during the CUS protocol are shown with variations with respect to treatment. Each group represents  $n = 6$  individuals  $\pm$  SEM with significance determined with a one-way ANOVA and Tukey's post-hoc analysis where \* $p < 0.05$ , \*\* $p < 0.01$  and \*\*\* $p < 0.001$ .

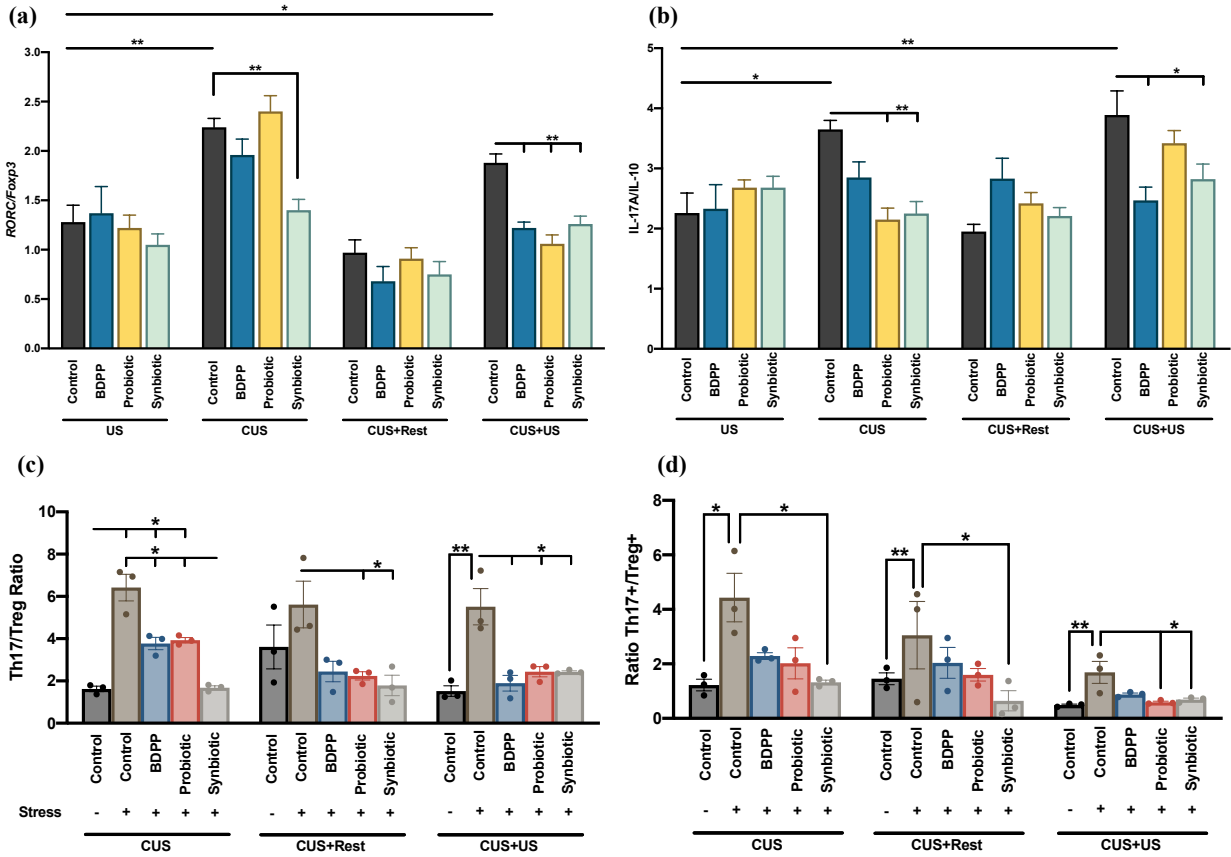

**Supplementary Figure 6: Stress and synbiotic induced variations on the ratio of Th17 to Treg and their activated states.** The ratios of Th17 to Treg cells was determined with (a) the ratio of transcription factors *Roryt* to *Foxp3*, (b) ratio of cytokines IL-17A to IL-10, (c) the ratio of unactivated Th17/Treg cells and (d) ratio of “activated” Th17 (IL-17A<sup>+</sup>ICOS<sup>+</sup>) and Treg (CTLA4<sup>+</sup>). For the gene and cytokine expression,  $n = 6$  independent samples +/- SEM were used, while  $n = 3$  individuals for the cellular data, while statistics were calculated with one-way ANOVAs in all cases with Tukey’s post-hoc analysis \* $p < 0.05$ , \*\* $p < 0.01$ .

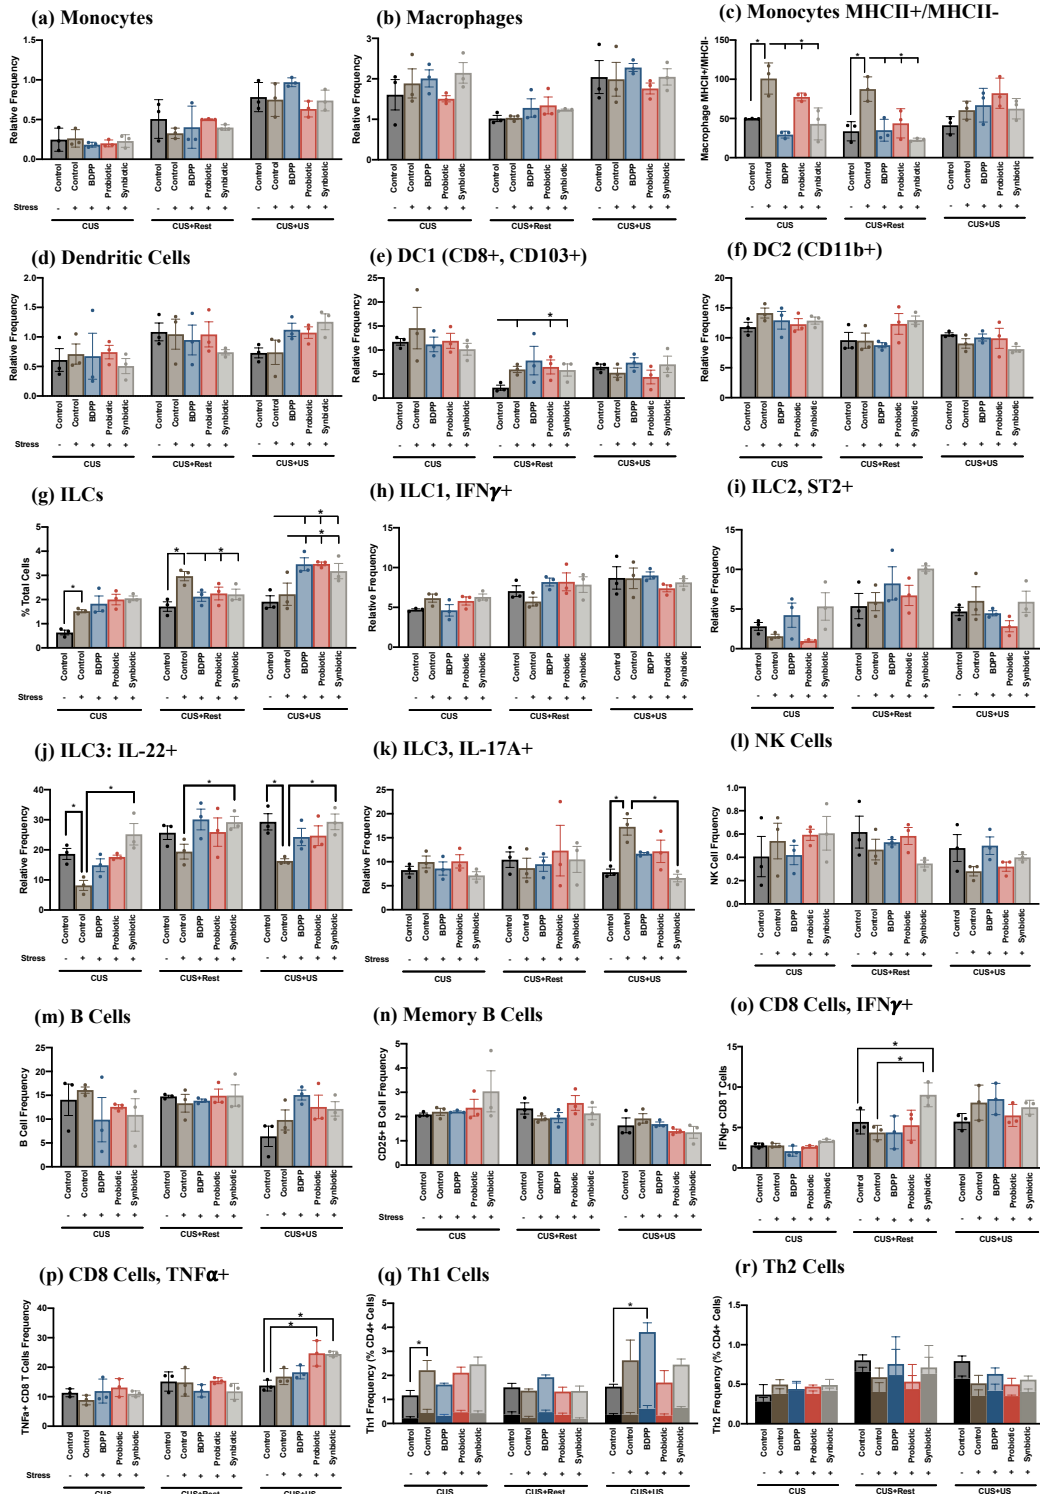

**Supplementary Figure 7: Ileum additional cell population quantification.** Relative cellular expression (as indicated on y-axis) or activation for various cell populations and their activation states are shown for **(a)** monocytes relative to total cell populations, **(b)** macrophages relative to total cell populations, **(c)** ratio of MHCII<sup>+</sup> to MHCII<sup>-</sup> cells, **(d)** dendritic cells (DC) relative to total cell populations, **(e)** DC1 and **(f)** DC2 relative to total DC cell population, **(g)** innate

lymphoid cells (ILCs) relative to total cell populations, **(h)** ILC1, **(i)** ILC2, **(j)** ILC3 IL-22<sup>+</sup> and **(k)** ILC3 IL-17A<sup>+</sup> relative to ILC populations, **(l)** NK cells relative to total cell populations, **(m)** B cells and **(n)** memory B cells relative total cell populations, **(o)** CD8 IFN $\gamma$  cells and **(p)** CD8 TNF $\alpha$  cells relative to CD8 cell populations and **(q)** Th1 and **(r)** Th2 cells relative to total cell populations in their naïve and activated states (solid superimposed bars). In all cases,  $n = 3$  individuals +/- SEM are shown and significance indicated with a one-way ANOVA with Tukey's post-hoc analysis with \* $p < 0.05$ , \*\* $p < 0.01$ .



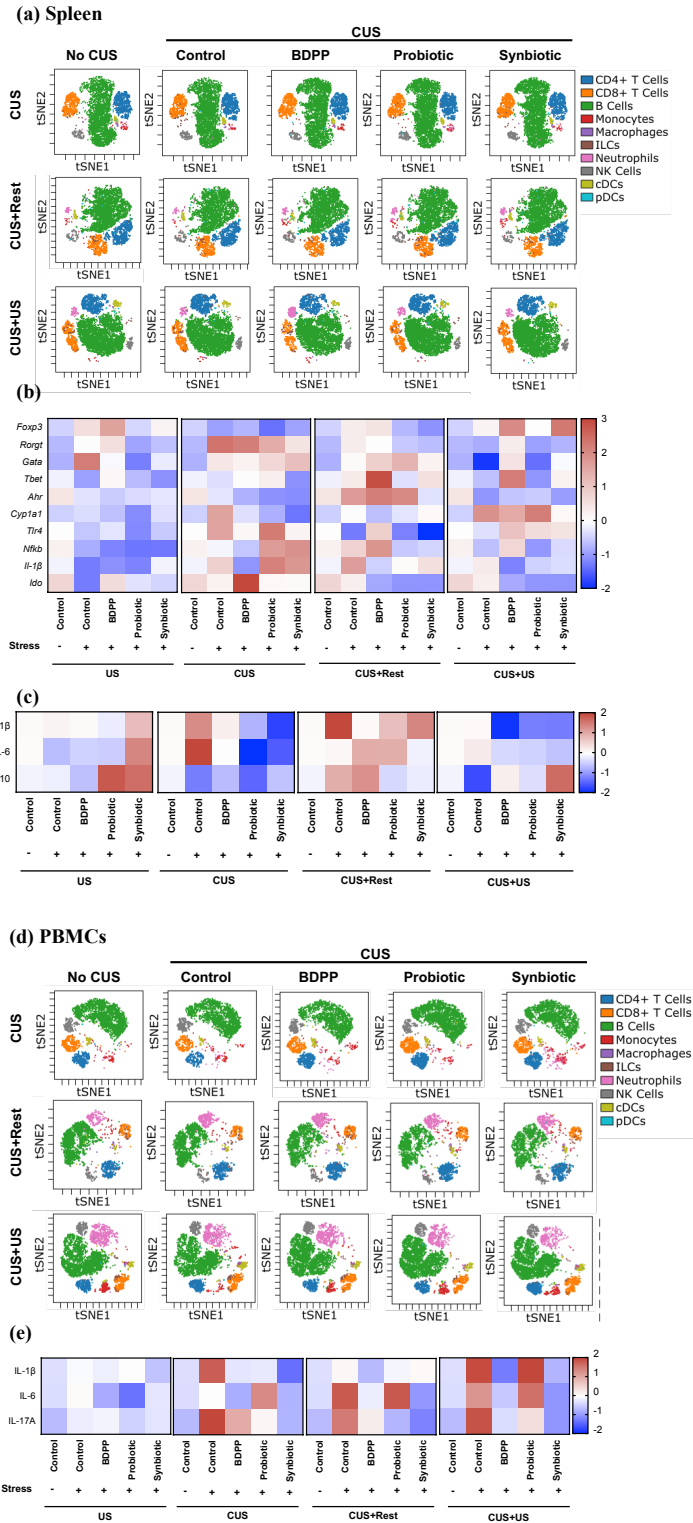

**Supplementary Figure 8: Immune cell distribution in spleen and PBMCs.** Major cell populations determined with CyTOF immunophenotyping in the **(a)** spleen and quantification of **(b)** genes and **(c)** cytokines in the spleen are shown as heatmaps with each instance being the ratio of stressed vs. non-stressed group within each treatment, with the z-score taken across time for each gene. Major cell populations from **(d)** PBMCs are represented in viSNE plots while

proinflammatory cytokine expression in the serum is shown as a heatmap in (e). For the cell frequencies,  $n = 3$  independent samples  $\pm$  SEM are shown while for the gene and cytokine determination,  $n = 6 \pm$  SEM is shown.

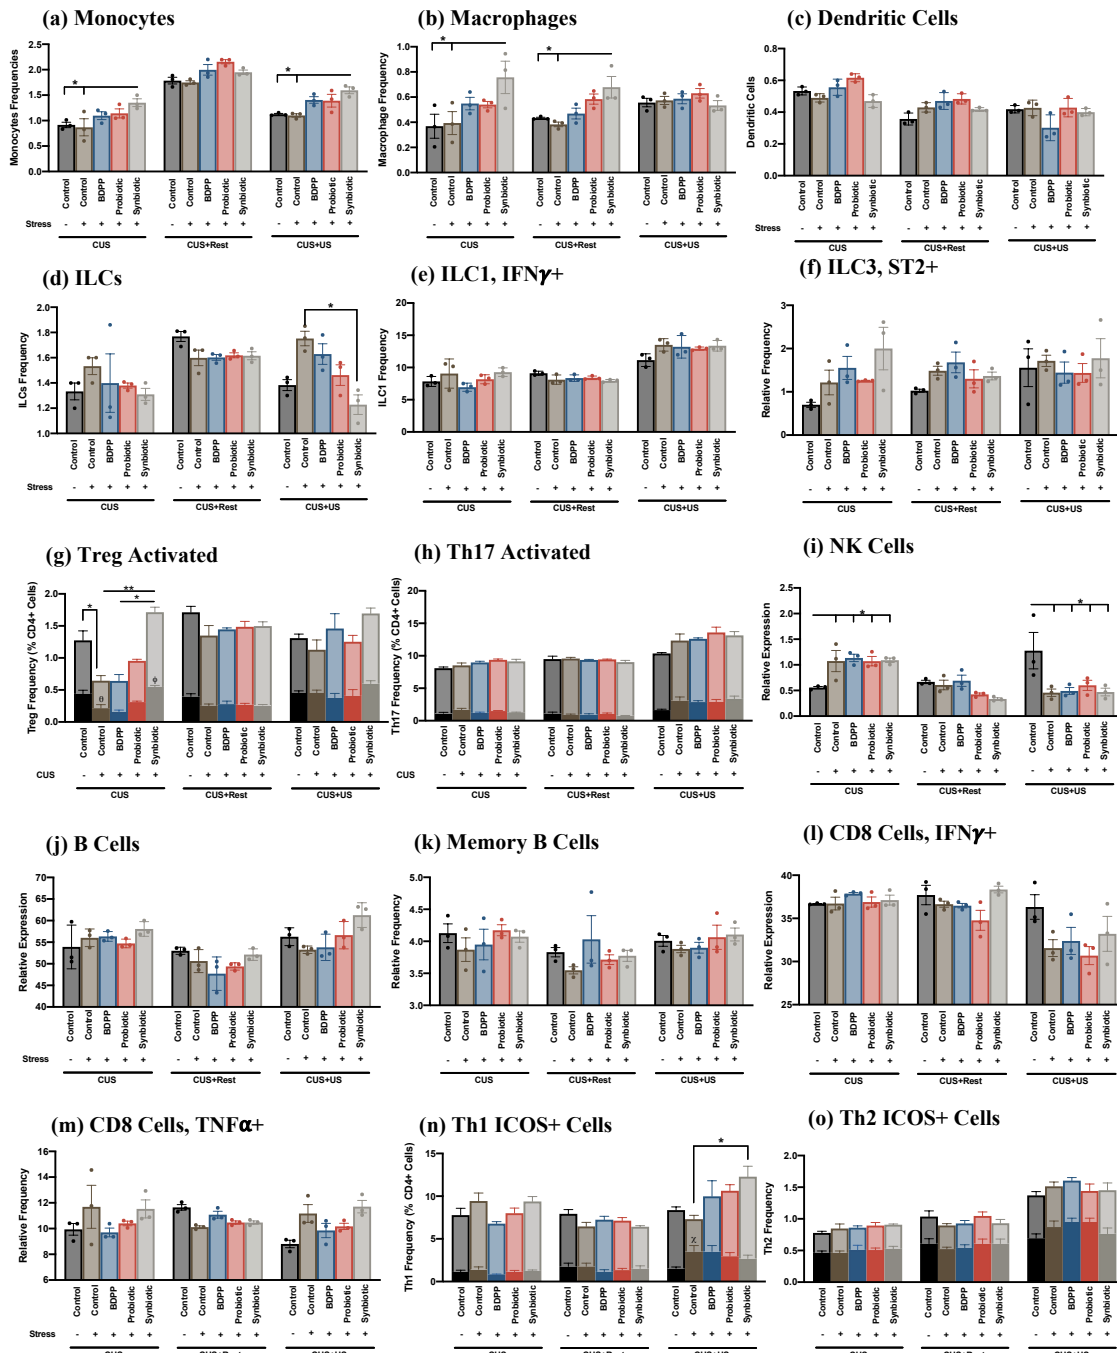

**Supplementary Figure 9: Spleen additional cell population quantification.** Relative cellular expression (as indicated on y-axis) or activation for various cell populations and their activation states are shown for (a) monocytes relative to total cell populations, (b) macrophages relative to total cell populations, (c) dendritic cells (DC) relative to total cell populations, (d) innate lymphoid cells (ILCs) relative to total cell populations, (e) ILC1 and (f) ILC3 relative to total

cell populations, **(g)** regulatory T cells (Tregs) and **(h)** T helper (Th)17 cells, both with an inset of activated cell populations (Treg, CTLA4<sup>+</sup> and Th17, IL17A<sup>+</sup>ICOS<sup>+</sup>) relative to total CD4<sup>+</sup> cells, **(i)** NK cells relative to total cell populations, **(j)** B cells and **(k)** memory B cells relative total cell populations, **(l)** CD8 IFN $\gamma$  cells and **(m)** CD8 TNF $\alpha$  cells relative to total CD8 cell populations and **(n)** Th1 and **(o)** Th2 cells relative to total CD4<sup>+</sup> cell populations in their naïve and activated states (solid superimposed bars). In all cases,  $n = 3$  individuals +/- SEM are shown and significance indicated with a one-way ANOVA with Tukey's post-hoc analysis with \* $p < 0.05$ , \*\* $p < 0.01$ .

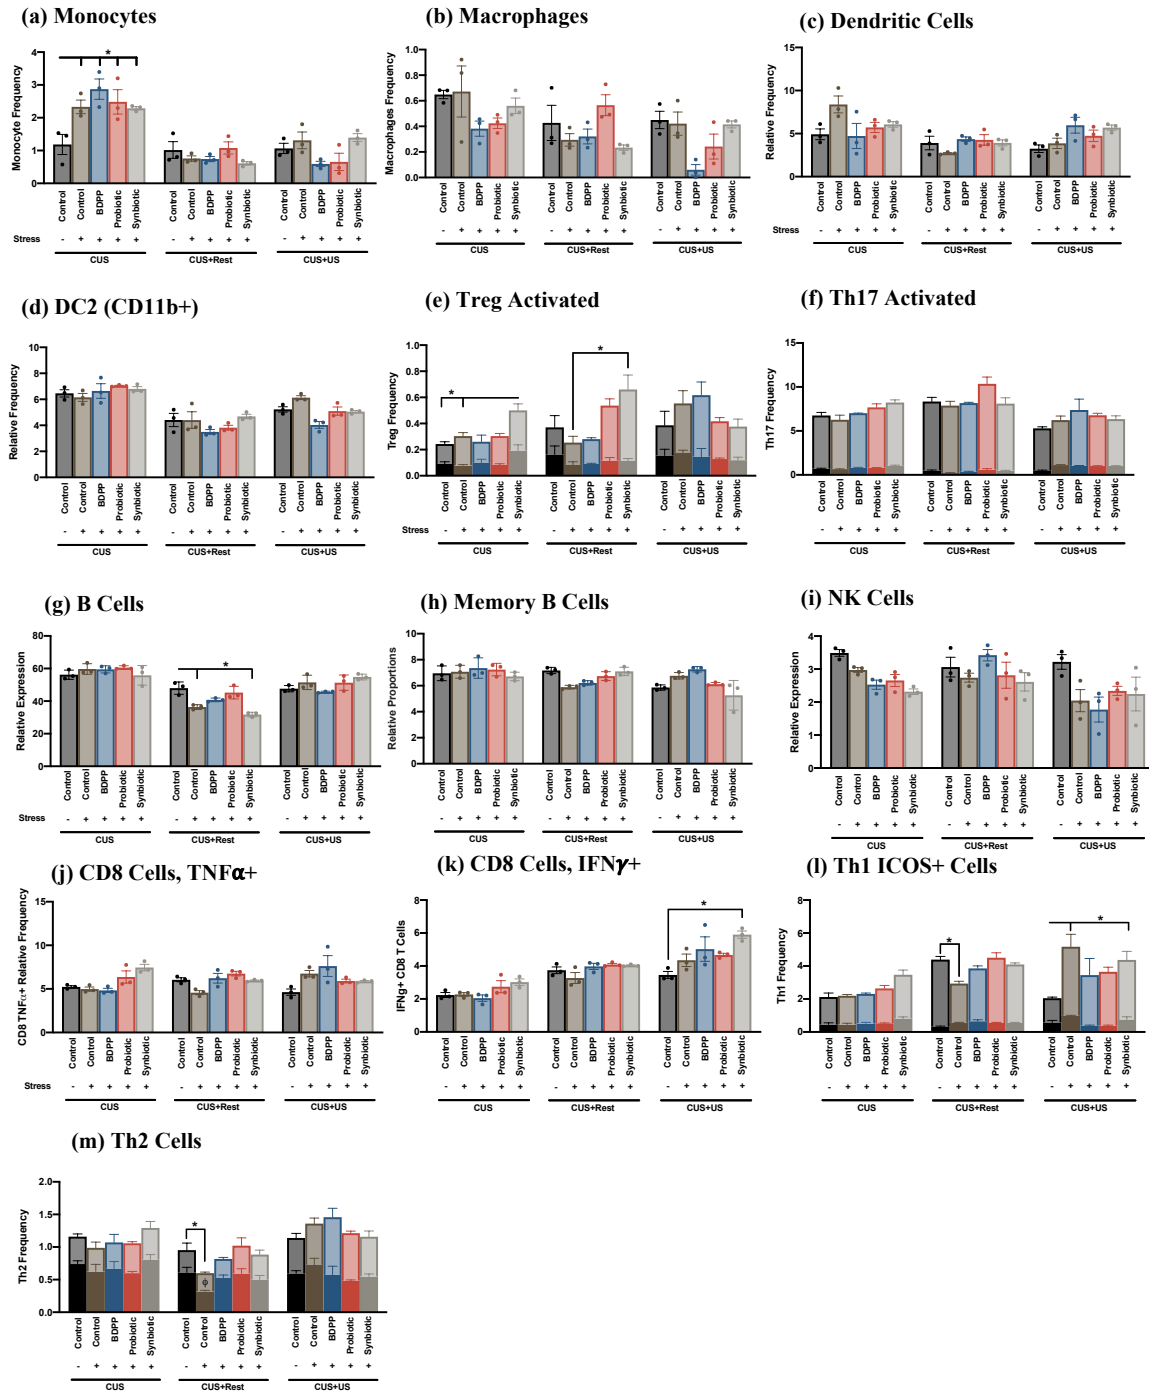

**Supplementary Figure 10: PBMC additional cell population quantification.** Relative cellular expression (as indicated on y-axis) or activation for various cell populations and their activation states are shown for **(a)** monocytes relative to total cell populations, **(b)** macrophages relative to total cell populations, **(c)** dendritic cells (DC) relative to total cell populations, **(d)** DC2 relative to total DC cell populations, **(e)** regulatory T cells (Tregs) and **(f)** T helper (Th)17 cells, both with an inset of activated cell populations (Treg, CTLA4<sup>+</sup> and Th17, IL17A<sup>+</sup>ICOS<sup>+</sup>) relative to total CD4<sup>+</sup> cells, **(g)** B cells and **(h)** memory B cells relative total cell populations, **(i)** NK cells relative to total cell populations, **(j)** CD8 TNF $\alpha$  cells and **(k)** CD8 IFN $\gamma$  cells relative to total

CD8 cell populations and **(l)** Th1 and **(m)** Th2 cells relative to total CD4+ cell populations in their naïve and activated states (solid superimposed bars). In all cases,  $n = 3$  individuals  $\pm$  SEM are shown and significance indicated with a one-way ANOVA with Tukey's post-hoc analysis with \* $p < 0.05$ , \*\* $p < 0.01$ .

**Supplementary Table 1: Polyphenol-free Diet Composition**

The polyphenol-free diet was custom modified from Research Diets Ain-93G diet (New Brunswick, NJ, USA)

| <b>Class Description</b> | <b>Ingredient</b>        | <b>Grams</b>         |
|--------------------------|--------------------------|----------------------|
| Protein                  | Casein, Lactic, 30 Mesh  | 200 g                |
| Protein                  | Cystine, L               | 3 g                  |
| Carbohydrate             | Starch, Corn             | 397 g                |
| Carbohydrate             | Maltodextrin 10          | 132 g                |
| Carbohydrate             | Sucrose, Fine Granulated | 100 g                |
| Fiber                    | Cellulose, BW200         | 50 g                 |
| Fat                      | Corn Oil                 | 70 g                 |
| Mineral                  | S10022G                  | 35 g                 |
| Vitamin                  | V10037                   | 10 g                 |
| Vitamin                  | Choline Bitartrate       | 2.5 g                |
|                          |                          | <b>Total: 1000 g</b> |

| <b>Caloric Information</b> |             |
|----------------------------|-------------|
| Protein                    | 20.3 % kcal |
| Fat                        | 15.8 % kcal |
| Carbohydrate               | 63.9 % kcal |
| Energy Density             | 4.00 kcal/g |

**Supplementary Table 2: Chronic Unpredictable Stress Protocol**

| <b>Day</b>    | <b>Stress 1</b>                   | <b>Stress 2</b>                    |
|---------------|-----------------------------------|------------------------------------|
| <b>Week 1</b> |                                   |                                    |
| Monday        | Crowding, 60 min                  | Cage Tilt, 45°, 12h (7PM - 7AM)    |
| Tuesday       | Cold Swim (4°C, 5min)             | Lights ON 12h, (6PM - 6AM)         |
| Wednesday     | Cage Shaking, 20 min              | Food deprivation, 12h (7PM - 7AM)  |
| Thursday      | Wet Bedding, 6hr (10am-4pm)       | Forced swim, 5min, 4°C             |
| Friday        | Restraint Stress, 1hr             | Cage Tilt, 45°, 12h (7PM – 7AM)    |
| Saturday      | Fox odor, 10h (8AM – 6PM)         | Lights ON 12h, (6PM - 6AM)         |
| Sunday        | Water deprivation, 10h (10AM-6PM) | Cold exposure (4C, 1hr)            |
| <b>Week 2</b> |                                   |                                    |
| Monday        | Forced swim, 5min, 4°C            | No Bedding (12h, 6PM - 6AM)        |
| Tuesday       | Cage Shaking, 20 min              | Fox Odor (12h, 8PM - 8AM)          |
| Wednesday     | Restraint Stress, 1hr             | Water Deprivation (8h, 12AM - 8AM) |
| Thursday      | Forced swim, 5min, 4°C            | Cold Exposure (20min, 4C)          |
| Friday        | Wet Bedding, 10h (10AM – 8PM)     | No Bedding, 12 h (8PM-8AM)         |
| Saturday      | Cage Tilt, 45°, 12h (7AM-7PM)     | Fox odor, 10h (10PM – 8AM)         |
| Sunday        | Cage Shaking, 20 min              | Cage Tilt, 45°, 12h (7PM – 7AM)    |
| <b>Week 3</b> |                                   |                                    |
| Monday        | Cold Swim (4°C, 5min)             | Food&Water Dep., 12h, (8PM-8AM)    |
| Tuesday       | Cage Shaking, 20 min              | Lights ON 12h, (6PM - 6AM)         |
| Wednesday     | Crowding, 60 min                  | Cage Tilt, 45° , 12h (7PM – 7AM)   |
| Thursday      | Wet Bedding, 8h (10AM-6PM)        | Restraint Stress, 1hr              |
| Friday        | Food Deprivation, 12h (8AM-8PM)   | No Bedding, 12 h (8PM-8AM)         |

|               |                            |                                 |
|---------------|----------------------------|---------------------------------|
| Saturday      | Fox odor, 8h (10AM – 6PM)  | Lights ON 12h, (6PM - 6AM)      |
| Sunday        | Restraint Stress, 1hr      | Wet Bedding, 8h (10AM-6PM)      |
| <b>Week 4</b> |                            |                                 |
| Monday        | Fox odor, 10h (10AM – 8PM) | Cage Tilt, 45°, 8h (12PM – 8AM) |
| Tuesday       | Cold Swim (4°C, 5min)      | Food&Water Dep., 12h, (8PM-8AM) |
| Wednesday     | Cage Shaking, 20 min       | Wet Bedding, 10h (10PM-8AM)     |
| Thursday      | Crowding, 60 min           | Restraint Stress, 1hr           |
| Friday        | Cold exposure (4C, 1hr)    | Wet Bedding, 10h (10PM-8AM)     |
| Saturday      | No Bedding, 10h (8AM-6PM)  | Cage Tilt, 45°, 8h (12PM – 8AM) |
| Sunday        | Crowding, 60 min           | Fox odor, 10h (10AM – 8PM)      |

|                        |                            |                                 |
|------------------------|----------------------------|---------------------------------|
| <b>Subthreshold US</b> |                            |                                 |
| Monday                 | Fox odor, 10h (10AM – 8PM) | Cage Tilt, 45°, 8h (12PM – 8AM) |
| Tuesday                | Cold Swim (4°C, 5min)      | Food&Water Dep., 12h, (8PM-8AM) |
| Wednesday              | Cage Shaking, 20 min       | Wet Bedding, 10h (10PM-8AM)     |
| Thursday               | Crowding, 60 min           | Restraint Stress, 1hr           |
| Friday                 | Cold exposure (4C, 1hr)    | Wet Bedding, 10h (10PM-8AM)     |
| Saturday               | No Bedding, 10h (8AM-6PM)  | Cage Tilt, 45°, 8h (12PM – 8AM) |
| Sunday                 | Crowding, 60 min           | Fox odor, 10h (10AM – 8PM)      |



**Supplementary Table 3: Mouse Primer Sequences**

| <b>Gene</b>                   | <b>Accession Number</b> | <b>Sequence (5' – 3')</b>                                            | <b>Product Length (bp)</b> |
|-------------------------------|-------------------------|----------------------------------------------------------------------|----------------------------|
| <i>TLR2</i>                   | NM_011905.3             | F: CCGAAACCTCAGACAAAGCGTCA<br>R: TCACACACCCCAGAAGCATCACAT            | 144                        |
| <i>TLR4</i>                   | <u>NM_021297.3</u>      | F: GCAAAGTCCCTGATGACATTCCTT<br>R: CCACAGCCACCAGATTCTCTAAA            | 267                        |
| <i>IL-6</i>                   | NM_001314054.1          | F: CACAAGTCCGGAGACCAGAC<br>R: CAGAATTGCCATTGCACAAC                   | 142                        |
| <i>IL-1<math>\beta</math></i> | <u>NM_008361.4</u>      | F: TTCAGGCAGGCAGTATCACTC<br>R: CCACGGGAAAGACACAGGTAG                 | 69                         |
| <i>Nlrp3</i>                  | <u>NM_145827.4</u>      | F: AGAAGAGACCACGGCAGAA<br>R: CCTTGGACCAGGTTTCAGTGT                   | 102                        |
| <i>Casp1</i>                  | <u>NM_009807.2</u>      | F: CACATTTCCAGGACTGACTGG<br>R: AGACGTGTACGAGTGGTTGT                  | 120                        |
| <i>NF<math>\kappa</math>B</i> | <u>NM_021151352.2</u>   | F: CTGGTGGACACATACAGGAAGAC<br>R: ATAGGCACTGTCTTCTTTCACCTC            | 195                        |
| <i>ICAM</i>                   | <u>NM_010493.3</u>      | F: GTTTAAAACCAGACCCTGGA<br>R: CGTCTGCAGGTCATCTTAGGAG                 | 152                        |
| <i>VCAM</i>                   | <u>NM_011693.3</u>      | F: CCGGCATATACGAGTGTGAAT<br>R: ATGGCAGGTATTACCAAGGAAGAT              | 151                        |
| <i>IL-10</i>                  | <u>NM_010548.2</u>      | F: GCTCTTACTGACTGGCATGAG<br>R: CGCAGCTCTAGGAGCATGTG                  | 105                        |
| <i>CCL5</i>                   | <u>NM_013653.3</u>      | F: AGATCTCTGCAGCTGCCCTCA<br>R: GGAGCACTTGCTGCTGGTGTAG                | 170                        |
| <i>CCL2</i>                   | <u>NM_011333.3</u>      | F: GCATCCACGTGTTGGCTCA<br>R: CTCCAGCCTACTCATTGGGATCA                 | 95                         |
| <i>AHR</i>                    | <u>NM_001314027.1</u>   | F: ACCAGAAGTGTGAGGGTTGG<br>R: TCTGAGGTGCCTGAACTCCT                   | 155                        |
| <i>IDO</i>                    | <u>NM_145949.2</u>      | F: CCTCATCCCTCCTTCCTTTC<br>R: GGAGCAATTGCCTGGTATGT                   | 219                        |
| <i>Foxp3</i>                  | <u>NM_001199348.1</u>   | F: TTGGCCAGCGCCATCTT<br>R: TGCCTCCTCCAGAGAGAAGTG                     | 100                        |
| <i>Tbet</i>                   | <u>XM_021177762.1</u>   | <b>F: AGCAAGGACGGCGAATGTT</b><br><b>R: GGGTGGACATATAAGCGGTTC</b>     | 187                        |
| <i>Gata3</i>                  | <u>XM_029547696.1</u>   | <b>F: CGGCCATTTCGTACATGGAA</b><br><b>R: GGATACCTCTGCACCGTAGC</b>     | 135                        |
| <i>RORC</i>                   | <u>NM_001293734.1</u>   | <b>F: GTGGAGTTTGCCAAGCGGCTTT</b><br><b>R: CCTGCACATTCTGACTAGGACG</b> | 108                        |
| <i>IL-17A</i>                 | <u>NM_010552.3</u>      | F: AAGGCAGCAGCGATCATCC<br>R: GGAACGGTTGAGGTAGTCTGAG                  | 150                        |
| <i>Cyplal</i>                 | <u>NM_001136059.2</u>   | F: GGGTTTGACACAGTCACAAC                                              | 197                        |

|              |                       |                                |     |
|--------------|-----------------------|--------------------------------|-----|
|              |                       | R: GGGACGAAGGATGAATGCCG        |     |
| <i>IL23R</i> | <u>NM_144548.1</u>    | <b>GTCCACCAA</b> ACTTCCCAGACAG | 110 |
|              |                       | <b>CCTGAAGCAGGATGTCCTCTGA</b>  |     |
| <i>GAPDH</i> | <u>NM_001289726.1</u> | F: ATGTGTCCGTCGTGGATCTGAC      | 132 |
|              |                       | R: AGACAACCTGGTCCTCAGTGTAG     |     |

**Supplementary Table 4: Target Antibodies, clone and conjugate for CyTOF Experiments**  
 Tags marked with an asterisk (\*) were used in calculating the viSNE analysis

| <b>Target</b>   | <b>Clone</b> | <b>Source</b> | <b>Metal Conjugate</b> |
|-----------------|--------------|---------------|------------------------|
| CD45            | 30-F11       | Biologend     | 112Cd, 114Cd, 116Cd    |
| MHCI(H-2)*      | M1/42        | Biologend     | 112Cd, 114Cd, 116Cd    |
| Ly-6G*          | 1A8          | Fluidigm      | 141 Pr                 |
| CD11c*          | N418         | Biologend     | 142 Nd                 |
| TCRb*           | H57-597      | Fluidigm      | 143 Nd                 |
| CD115*          | AFS98        | Fluidigm      | 144 Nd                 |
| F4/80*          | BM8          | Fluidigm      | 146 Nd                 |
| CD11b*          | M1/70        | Biologend     | 148 Nd                 |
| CD19*           | 6D5          | Biologend     | 149 Sm                 |
| CD25*           | 3C7          | Biologend     | 151 Eu                 |
| CD3e*           | 145-2C11     | Fluidigm      | 152 Sm                 |
| CD16/32         | 93           | Fluidigm      | 153 Eu                 |
| CTLA4           | UC10-4B9     | Fluidigm      | 154 Sm                 |
| ST2*            | DIH9         | Biologend     | 155 Gd                 |
| Foxp3           | FJK-16s      | Fluidigm      | 158 Gd                 |
| RORgt           | B2D          | Fluidigm      | 159 Tb                 |
| B220*           | RA3-6B2      | Fluidigm      | 160 Gd                 |
| CD103*          | 2E7'         | Biologend     | 161 Dy                 |
| TNF $\alpha$    | MP6-T22      | Fluidigm      | 162 Dy                 |
| IL-23R*         | polyclonal   | Novus Bio     | 163 Dy                 |
| Sca-1           | D7           | Fluidigm      | 164 Dy                 |
| IFN $\gamma$    | XMG1.2       | Fluidigm      | 165 Ho                 |
| CD117*          | 2B8          | Biologend     | 166 Er                 |
| NKp46*          | 29A1.4       | Fluidigm      | 167 Er                 |
| CD8*            | 53-6.7       | Biologend     | 168 Er                 |
| IL22*           | NBP2-11699   | Novus Bio     | 169 Tm                 |
| NK1.1*          | PK136        | Fluidigm      | 170 Er                 |
| CD4*            | RM4-5        | Biologend     | 172 Yb                 |
| IL-17A          | TC11-18H10.1 | Fluidigm      | 174 Yb                 |
| CD127*          | A7R34        | Biologend     | 175 Lu                 |
| ICOS*           | 7E.17G9      | Fluidigm      | 176 Yb                 |
| MHCII (I-A/I-E) | M5.114.15.2  | Fluidigm      | 209 Bi                 |

**Supplementary Table 4: Fold change of relative gene expression of inflammatory markers in the prefrontal cortex.** Detailed gene expression analysis of data presented in figure 2b. Each value is represented as the fold change of the relative gene expression (relative to *gapdh*) from stressed vs. unstressed controls at the same timepoint. Each value is the mean of n = 6 independent samples +/- SEM.

|       |           | US          | CUS         | CUS+Rest    | CUS+US      |
|-------|-----------|-------------|-------------|-------------|-------------|
| TLR4  | Control   | 0.79 ± 0.22 | 1.66 ± 0.20 | 1.22 ± 0.21 | 1.50 ± 0.18 |
|       | BDPP      | 1.32 ± 0.25 | 1.00 ± 0.29 | 1.16 ± 0.15 | 0.95 ± 0.18 |
|       | Probiotic | 0.72 ± 0.44 | 1.81 ± 0.13 | 0.96 ± 0.21 | 1.27 ± 0.26 |
|       | Synbiotic | 0.89 ± 0.20 | 1.11 ± 0.21 | 1.13 ± 0.19 | 0.98 ± 0.24 |
| Nfkb  | Control   | 0.97 ± 0.21 | 1.01 ± 0.14 | 0.91 ± 0.23 | 0.94 ± 0.24 |
|       | BDPP      | 1.25 ± 0.21 | 0.73 ± 0.23 | 1.03 ± 0.13 | 0.78 ± 0.11 |
|       | Probiotic | 1.15 ± 0.24 | 1.10 ± 0.19 | 0.95 ± 0.16 | 1.05 ± 0.25 |
|       | Synbiotic | 1.24 ± 0.17 | 0.93 ± 0.15 | 1.06 ± 0.17 | 0.88 ± 0.21 |
| Casp1 | Control   | 1.30 ± 0.20 | 1.45 ± 0.30 | 0.77 ± 0.22 | 1.62 ± 0.30 |
|       | BDPP      | 0.99 ± 0.31 | 1.16 ± 0.24 | 1.26 ± 0.30 | 0.73 ± 0.34 |
|       | Probiotic | 1.14 ± 0.26 | 1.69 ± 0.23 | 0.88 ± 0.30 | 1.04 ± 0.32 |
|       | Synbiotic | 1.21 ± 0.30 | 1.13 ± 0.21 | 0.97 ± 0.36 | 1.25 ± 0.27 |
| Il1b  | Control   | 0.99 ± 0.37 | 1.91 ± 0.41 | 1.00 ± 0.24 | 1.60 ± 0.28 |
|       | BDPP      | 1.41 ± 0.39 | 1.57 ± 0.25 | 0.89 ± 0.23 | 0.80 ± 0.26 |
|       | Probiotic | 1.05 ± 0.44 | 1.81 ± 0.39 | 1.01 ± 0.22 | 1.19 ± 0.09 |
|       | Synbiotic | 1.11 ± 0.30 | 1.57 ± 0.30 | 1.10 ± 0.23 | 0.75 ± 0.42 |
| CCL2  | Control   | 0.97 ± 0.32 | 2.13 ± 0.23 | 1.54 ± 0.15 | 3.50 ± 0.16 |
|       | BDPP      | 1.48 ± 0.09 | 1.68 ± 0.23 | 1.17 ± 0.19 | 1.95 ± 0.18 |
|       | Probiotic | 1.33 ± 0.44 | 3.54 ± 0.32 | 1.58 ± 0.22 | 0.78 ± 0.40 |
|       | Synbiotic | 1.32 ± 0.26 | 1.87 ± 0.26 | 1.57 ± 0.17 | 1.00 ± 0.13 |
| CCL5  | Control   | 0.83 ± 0.06 | 2.21 ± 0.16 | 1.09 ± 0.14 | 1.68 ± 0.15 |
|       | BDPP      | 0.65 ± 0.05 | 1.25 ± 0.17 | 1.28 ± 0.16 | 1.59 ± 0.06 |
|       | Probiotic | 0.92 ± 0.12 | 1.23 ± 0.40 | 0.80 ± 0.05 | 2.09 ± 0.14 |
|       | Synbiotic | 0.95 ± 0.13 | 1.27 ± 0.20 | 1.16 ± 0.02 | 1.20 ± 0.24 |
| ICAM  | Control   | 1.24 ± 0.21 | 2.67 ± 0.18 | 1.18 ± 0.14 | 2.35 ± 0.15 |
|       | BDPP      | 2.08 ± 0.20 | 1.99 ± 0.28 | 1.04 ± 0.17 | 0.87 ± 0.06 |
|       | Probiotic | 1.30 ± 0.20 | 1.48 ± 0.19 | 1.06 ± 0.04 | 1.02 ± 0.47 |
|       | Synbiotic | 1.40 ± 0.19 | 1.04 ± 0.15 | 1.24 ± 0.18 | 0.47 ± 0.13 |
| VCAM  | Control   | 1.16 ± 0.11 | 1.98 ± 0.18 | 0.85 ± 0.15 | 2.08 ± 0.23 |
|       | BDPP      | 1.02 ± 0.19 | 1.78 ± 0.19 | 1.02 ± 0.17 | 2.01 ± 0.16 |
|       | Probiotic | 0.60 ± 0.15 | 2.00 ± 0.17 | 1.13 ± 0.15 | 1.47 ± 0.12 |
|       | Synbiotic | 0.81 ± 0.25 | 1.74 ± 0.10 | 1.21 ± 0.11 | 1.17 ± 0.16 |

**Supplementary Table 5: Ileal Inflammatory Cytokine Expression.** Detailed cytokine expression analysis of data presented in figure 4c. Each value represents the fold change of the absolute cytokine expression between the stressed and non-stressed groups. Each value is the mean of n = 6 independent samples +/- SEM.

|            |           | US          | CUS         | CUS+Rest    | CUS+US      |
|------------|-----------|-------------|-------------|-------------|-------------|
| IL-17A     | Control   | 1.35 ± 0.25 | 2.15 ± 0.12 | 0.78 ± 0.10 | 1.40 ± 0.21 |
|            | BDPP      | 1.08 ± 0.14 | 1.87 ± 0.21 | 1.03 ± 0.17 | 0.62 ± 0.07 |
|            | Probiotic | 1.19 ± 0.20 | 1.29 ± 0.09 | 1.07 ± 0.24 | 1.00 ± 0.13 |
|            | Synbiotic | 1.08 ± 0.19 | 1.07 ± 0.06 | 0.85 ± 0.20 | 1.33 ± 0.20 |
| IL-1b      | Control   | 0.95 ± 0.11 | 1.83 ± 0.22 | 0.64 ± 0.09 | 1.26 ± 0.31 |
|            | BDPP      | 0.86 ± 0.12 | 0.88 ± 0.20 | 0.60 ± 0.10 | 0.51 ± 0.07 |
|            | Probiotic | 0.73 ± 0.21 | 0.76 ± 0.19 | 0.52 ± 0.15 | 1.19 ± 0.21 |
|            | Synbiotic | 0.72 ± 0.11 | 0.65 ± 0.12 | 0.94 ± 0.15 | 0.82 ± 0.31 |
| IL-6       | Control   | 0.86 ± 0.31 | 1.99 ± 0.09 | 0.77 ± 0.13 | 1.61 ± 0.15 |
|            | BDPP      | 1.75 ± 0.21 | 0.93 ± 0.07 | 0.97 ± 0.20 | 0.76 ± 0.10 |
|            | Probiotic | 1.21 ± 0.15 | 1.39 ± 0.22 | 0.68 ± 0.12 | 1.03 ± 0.25 |
|            | Synbiotic | 1.43 ± 0.22 | 0.85 ± 0.24 | 0.88 ± 0.12 | 0.90 ± 0.05 |
| IL-10      | Control   | 1.03 ± 0.11 | 1.34 ± 0.21 | 0.76 ± 0.14 | 0.92 ± 0.14 |
|            | BDPP      | 0.96 ± 0.23 | 1.62 ± 0.10 | 0.91 ± 0.10 | 1.14 ± 0.20 |
|            | Probiotic | 0.77 ± 0.21 | 1.83 ± 0.31 | 0.58 ± 0.08 | 0.62 ± 0.08 |
|            | Synbiotic | 1.82 ± 0.13 | 1.32 ± 0.21 | 1.06 ± 0.21 | 1.16 ± 0.09 |
| Kynurenine | Control   | 0.83 ± 0.12 | 2.53 ± 0.30 | 1.04 ± 0.10 | 2.11 ± 0.21 |
|            | BDPP      | 1.25 ± 0.20 | 0.87 ± 0.16 | 0.84 ± 0.17 | 0.85 ± 0.15 |
|            | Probiotic | 1.34 ± 0.18 | 1.36 ± 0.22 | 0.93 ± 0.20 | 0.48 ± 0.41 |
|            | Synbiotic | 1.64 ± 0.21 | 0.62 ± 0.11 | 1.05 ± 0.17 | 0.70 ± 0.20 |

**Supplementary Table 6: Ileal Immune Cell Marker Gene Expression.** Detailed gene expression analysis of data presented in figure 4d. Each value is represented as the fold change of the relative gene expression (relative to *gapdh*) from stressed vs. unstressed controls at the same timepoint. Each value is the mean of n = 6 independent samples +/- SEM.

|               |           | US          | CUS         | CUS+Rest    | CUS+US      |
|---------------|-----------|-------------|-------------|-------------|-------------|
| <i>Foxp3</i>  | Control   | 1.20 ± 0.34 | 1.07 ± 0.21 | 1.17 ± 0.09 | 1.58 ± 0.18 |
|               | BDPP      | 1.15 ± 0.17 | 1.09 ± 0.06 | 1.57 ± 0.14 | 1.89 ± 0.27 |
|               | Probiotic | 1.24 ± 0.18 | 0.77 ± 0.10 | 1.23 ± 0.12 | 1.50 ± 0.21 |
|               | Synbiotic | 1.69 ± 0.10 | 1.75 ± 0.19 | 1.65 ± 0.15 | 1.95 ± 0.11 |
| <i>Rorc</i>   | Control   | 1.20 ± 0.10 | 1.76 ± 0.14 | 0.98 ± 0.20 | 2.49 ± 0.24 |
|               | BDPP      | 1.69 ± 0.12 | 1.42 ± 0.18 | 0.84 ± 0.19 | 2.98 ± 0.10 |
|               | Probiotic | 1.15 ± 0.09 | 1.63 ± 0.19 | 1.13 ± 0.13 | 1.92 ± 0.16 |
|               | Synbiotic | 1.70 ± 0.11 | 1.69 ± 0.20 | 1.18 ± 0.13 | 2.37 ± 0.18 |
| <i>Gata3</i>  | Control   | 0.84 ± 0.42 | 1.02 ± 0.21 | 1.46 ± 0.15 | 1.08 ± 0.11 |
|               | BDPP      | 0.99 ± 0.11 | 1.02 ± 0.16 | 1.92 ± 0.17 | 0.89 ± 0.25 |
|               | Probiotic | 0.98 ± 0.31 | 0.90 ± 0.17 | 1.29 ± 0.17 | 1.50 ± 0.20 |
|               | Synbiotic | 1.32 ± 0.17 | 1.12 ± 0.19 | 2.03 ± 0.17 | 1.68 ± 0.21 |
| <i>Tbet</i>   | Control   | 1.33 ± 0.13 | 1.13 ± 0.14 | 1.02 ± 0.26 | 0.76 ± 0.17 |
|               | BDPP      | 0.82 ± 0.42 | 1.33 ± 0.15 | 1.48 ± 0.42 | 1.73 ± 0.31 |
|               | Probiotic | 1.07 ± 0.19 | 0.75 ± 0.27 | 0.72 ± 0.18 | 1.12 ± 0.11 |
|               | Synbiotic | 1.13 ± 0.14 | 1.18 ± 0.29 | 1.05 ± 0.25 | 1.08 ± 0.13 |
| <i>Ahr</i>    | Control   | 1.22 ± 0.13 | 1.00 ± 0.13 | 1.30 ± 0.06 | 1.14 ± 0.13 |
|               | BDPP      | 1.26 ± 0.13 | 1.19 ± 0.13 | 1.36 ± 0.16 | 1.72 ± 0.10 |
|               | Probiotic | 1.12 ± 0.14 | 1.00 ± 0.14 | 1.27 ± 0.12 | 1.43 ± 0.14 |
|               | Synbiotic | 1.42 ± 0.14 | 1.31 ± 0.25 | 1.26 ± 0.21 | 1.31 ± 0.10 |
| <i>Cyp1a1</i> | Control   | 0.72 ± 0.08 | 2.24 ± 0.16 | 0.86 ± 0.12 | 2.59 ± 0.21 |
|               | BDPP      | 0.40 ± 0.28 | 2.27 ± 0.31 | 1.11 ± 0.18 | 2.46 ± 0.25 |
|               | Probiotic | 0.64 ± 0.31 | 2.55 ± 0.18 | 0.80 ± 0.03 | 2.48 ± 0.18 |
|               | Synbiotic | 1.02 ± 0.17 | 1.27 ± 0.15 | 0.74 ± 0.11 | 1.64 ± 0.15 |

**Supplementary Table 7: Prefrontal Cortex Inflammatory Cytokine Expression.**

Detailed cytokine expression analysis of data presented in Supplementary Figure 2. Each value represents the fold change of the absolute cytokine expression between the stressed and non-stressed groups. Each value is the mean of n = 6 independent samples +/- SEM.

|       |           | US          | CUS         | CUS+Rest    | CUS+US      |
|-------|-----------|-------------|-------------|-------------|-------------|
| IL-1b | Control   | 0.99 ± 0.17 | 1.71 ± 0.13 | 1.10 ± 0.10 | 0.77 ± 0.06 |
|       | BDPP      | 1.41 ± 0.22 | 1.22 ± 0.20 | 1.02 ± 0.19 | 0.96 ± 0.11 |
|       | Probiotic | 1.44 ± 0.20 | 1.44 ± 0.11 | 1.05 ± 0.22 | 1.00 ± 0.31 |
|       | Synbiotic | 1.32 ± 0.09 | 0.83 ± 0.08 | 0.91 ± 0.07 | 1.06 ± 0.22 |
| IL-6  | Control   | 1.05 ± 0.13 | 0.87 ± 0.11 | 0.97 ± 0.21 | 1.00 ± 0.21 |
|       | BDPP      | 1.12 ± 0.22 | 0.98 ± 0.21 | 1.04 ± 0.25 | 0.93 ± 0.13 |
|       | Probiotic | 0.98 ± 0.06 | 1.05 ± 0.30 | 0.99 ± 0.29 | 0.89 ± 0.13 |
|       | Synbiotic | 0.99 ± 0.15 | 1.09 ± 0.18 | 1.00 ± 0.11 | 0.85 ± 0.14 |
| IL-10 | Control   | 0.90 ± 0.10 | 1.17 ± 0.13 | 1.18 ± 0.29 | 1.10 ± 0.07 |
|       | BDPP      | 0.83 ± 0.03 | 1.33 ± 0.20 | 1.04 ± 0.20 | 1.32 ± 0.14 |
|       | Probiotic | 1.29 ± 0.10 | 1.78 ± 0.21 | 1.17 ± 0.10 | 1.14 ± 0.11 |
|       | Synbiotic | 1.47 ± 0.07 | 1.15 ± 0.22 | 0.78 ± 0.13 | 1.00 ± 0.10 |

**Supplementary Table 8: Hippocampus Inflammatory Cytokine Expression.**

Detailed cytokine expression analysis of data presented in Supplementary Figure 2. Each value represents the fold change of the absolute cytokine expression between the stressed and non-stressed groups. Each value is the mean of n = 6 independent samples +/- SEM.

|       |           | US          | CUS         | CUS+Rest    | CUS+US      |
|-------|-----------|-------------|-------------|-------------|-------------|
| IL-1b | Control   | 1.50 ± 0.21 | 1.18 ± 0.09 | 0.80 ± 0.27 | 0.80 ± 0.22 |
|       | BDPP      | 1.35 ± 0.11 | 0.63 ± 0.22 | 0.97 ± 0.18 | 1.06 ± 0.14 |
|       | Probiotic | 0.88 ± 0.10 | 0.92 ± 0.21 | 0.53 ± 0.05 | 1.04 ± 0.35 |
|       | Synbiotic | 0.93 ± 0.22 | 0.72 ± 0.10 | 1.03 ± 0.21 | 1.05 ± 0.29 |
| IL-6  | Control   | 1.30 ± 0.24 | 1.03 ± 0.71 | 1.13 ± 0.14 | 0.99 ± 0.28 |
|       | BDPP      | 1.07 ± 0.14 | 0.80 ± 0.19 | 1.18 ± 0.14 | 1.18 ± 0.16 |
|       | Probiotic | 1.12 ± 0.21 | 0.80 ± 0.23 | 1.07 ± 0.12 | 1.12 ± 0.18 |
|       | Synbiotic | 0.96 ± 0.22 | 0.72 ± 0.13 | 0.89 ± 0.11 | 0.86 ± 0.11 |
| IL-10 | Control   | 1.08 ± 0.34 | 0.99 ± 0.34 | 0.78 ± 0.17 | 0.96 ± 0.14 |
|       | BDPP      | 0.88 ± 0.12 | 0.78 ± 0.21 | 1.23 ± 0.72 | 1.62 ± 0.32 |
|       | Probiotic | 1.25 ± 0.14 | 1.10 ± 0.22 | 0.95 ± 0.17 | 0.75 ± 0.18 |
|       | Synbiotic | 1.22 ± 0.21 | 0.93 ± 0.19 | 0.70 ± 0.12 | 0.97 ± 0.21 |

**Supplementary Table 9: Hippocampal Immune Cell Marker Gene Expression.**

Detailed gene expression analysis of data presented in Supplementary Figure 2. Each value is represented as the fold change of the relative gene expression (relative to *gapdh*) from stressed vs. unstressed controls at the same timepoint. Each value is the mean of n = 6 independent samples +/- SEM.

|              |           | US          | CUS         | CUS+Rest    | CUS+US      |
|--------------|-----------|-------------|-------------|-------------|-------------|
| <i>Tlr4</i>  | Control   | 0.76 ± 0.12 | 1.93 ± 0.13 | 1.14 ± 0.15 | 2.10 ± 0.14 |
|              | BDPP      | 0.77 ± 0.15 | 2.37 ± 0.33 | 0.96 ± 0.24 | 2.34 ± 0.12 |
|              | Probiotic | 0.80 ± 0.21 | 2.76 ± 0.27 | 1.05 ± 0.16 | 2.22 ± 0.22 |
|              | Synbiotic | 0.90 ± 0.12 | 1.99 ± 0.16 | 1.79 ± 0.13 | 2.55 ± 0.12 |
| <i>Nfkb</i>  | Control   | 0.82 ± 0.13 | 1.46 ± 0.22 | 1.23 ± 0.23 | 1.46 ± 0.19 |
|              | BDPP      | 0.95 ± 0.13 | 1.15 ± 0.29 | 1.52 ± 0.17 | 1.99 ± 0.17 |
|              | Probiotic | 0.83 ± 0.17 | 2.06 ± 0.25 | 1.13 ± 0.26 | 1.51 ± 0.25 |
|              | Synbiotic | 1.03 ± 0.11 | 1.29 ± 0.31 | 1.39 ± 0.21 | 1.70 ± 0.14 |
| <i>Casp1</i> | Control   | 1.03 ± 0.16 | 1.00 ± 0.35 | 1.43 ± 0.28 | 0.75 ± 0.15 |
|              | BDPP      | 0.63 ± 0.41 | 1.58 ± 0.42 | 1.06 ± 0.21 | 1.57 ± 0.30 |
|              | Probiotic | 1.11 ± 0.19 | 2.69 ± 0.25 | 0.95 ± 0.18 | 1.08 ± 0.30 |
|              | Synbiotic | 0.64 ± 0.12 | 1.42 ± 0.14 | 1.28 ± 0.16 | 0.92 ± 0.17 |
| <i>Il1b</i>  | Control   | 1.10 ± 0.31 | 1.24 ± 0.13 | 1.09 ± 0.26 | 1.75 ± 0.18 |
|              | BDPP      | 0.95 ± 0.16 | 1.33 ± 0.19 | 0.81 ± 0.63 | 1.05 ± 0.30 |
|              | Probiotic | 1.41 ± 0.21 | 2.84 ± 0.15 | 0.60 ± 0.18 | 1.38 ± 0.13 |
|              | Synbiotic | 1.59 ± 0.28 | 3.13 ± 0.30 | 1.53 ± 0.41 | 1.02 ± 0.17 |
| <i>Ccl2</i>  | Control   | 0.70 ± 0.12 | 0.99 ± 0.17 | 0.74 ± 0.23 | 0.52 ± 0.16 |
|              | BDPP      | 0.52 ± 0.15 | 1.00 ± 0.25 | 0.41 ± 0.29 | 0.54 ± 0.11 |
|              | Probiotic | 0.44 ± 0.12 | 1.52 ± 0.27 | 0.81 ± 0.16 | 0.77 ± 0.12 |
|              | Synbiotic | 1.47 ± 0.42 | 0.73 ± 0.25 | 1.34 ± 0.14 | 1.32 ± 0.29 |
| <i>Ccl5</i>  | Control   | 1.90 ± 0.52 | 1.46 ± 0.17 | 1.00 ± 0.13 | 1.71 ± 0.26 |
|              | BDPP      | 0.71 ± 0.12 | 1.33 ± 0.15 | 1.02 ± 0.15 | 1.18 ± 0.31 |
|              | Probiotic | 0.84 ± 0.13 | 1.70 ± 0.25 | 1.26 ± 0.27 | 0.90 ± 0.31 |
|              | Synbiotic | 1.0 ± 0.19  | 0.87 ± 0.17 | 1.37 ± 0.22 | 0.84 ± 0.21 |
| <i>Icam</i>  | Control   | 0.78 ± 0.14 | 1.01 ± 0.81 | 1.04 ± 0.41 | 0.98 ± 0.22 |
|              | BDPP      | 0.66 ± 0.26 | 0.90 ± 0.16 | 1.23 ± 0.29 | 0.29 ± 0.45 |
|              | Probiotic | 0.95 ± 0.31 | 1.80 ± 0.13 | 0.72 ± 0.14 | 0.41 ± 0.23 |
|              | Synbiotic | 1.63 ± 0.17 | 1.80 ± 0.23 | 1.18 ± 0.31 | 0.31 ± 0.31 |
| <i>Vcam</i>  | Control   | 0.86 ± 0.18 | 0.85 ± 0.31 | 0.89 ± 0.25 | 1.09 ± 0.16 |
|              | BDPP      | 0.70 ± 0.18 | 0.73 ± 0.27 | 0.93 ± 0.28 | 0.53 ± 0.42 |
|              | Probiotic | 0.72 ± 0.22 | 1.18 ± 0.14 | 0.79 ± 0.30 | 1.10 ± 0.43 |
|              | Synbiotic | 1.09 ± 0.32 | 0.80 ± 0.20 | 1.07 ± 0.28 | 0.98 ± 0.26 |



**Supplementary Table 10: Cortex Inflammatory Cytokine Expression.** Detailed cytokine expression analysis of data presented in Supplementary Figure 2. Each value represents the fold change of the absolute cytokine expression between the stressed and non-stressed groups. Each value is the mean of n = 6 independent samples +/- SEM.

|       |           | US          | CUS         | CUS+Rest    | CUS+US      |
|-------|-----------|-------------|-------------|-------------|-------------|
| IL-1b | Control   | 1.34 ± 0.14 | 1.54 ± 0.18 | 0.57 ± 0.34 | 0.94 ± 0.32 |
|       | BDPP      | 1.22 ± 0.19 | 1.70 ± 0.24 | 0.80 ± 0.26 | 1.04 ± 0.31 |
|       | Probiotic | 0.85 ± 0.17 | 0.95 ± 0.22 | 0.78 ± 0.21 | 0.77 ± 0.21 |
|       | Synbiotic | 1.05 ± 0.15 | 1.10 ± 0.10 | 0.93 ± 0.32 | 1.56 ± 0.31 |
| IL-6  | Control   | 1.08 ± 0.08 | 0.83 ± 0.09 | 0.86 ± 0.16 | 1.21 ± 0.16 |
|       | BDPP      | 1.05 ± 0.21 | 0.43 ± 0.12 | 1.88 ± 0.23 | 0.92 ± 0.21 |
|       | Probiotic | 1.01 ± 0.11 | 1.04 ± 0.25 | 1.48 ± 0.31 | 0.38 ± 0.30 |
|       | Synbiotic | 1.01 ± 0.21 | 0.68 ± 0.18 | 1.50 ± 0.21 | 0.94 ± 0.32 |
| IL-10 | Control   | 1.21 ± 0.21 | 1.63 ± 0.13 | 0.63 ± 0.12 | 0.97 ± 0.17 |
|       | BDPP      | 1.25 ± 0.31 | 1.40 ± 0.21 | 0.85 ± 0.21 | 0.88 ± 0.21 |
|       | Probiotic | 1.10 ± 0.17 | 0.89 ± 0.19 | 0.72 ± 0.18 | 0.97 ± 0.16 |
|       | Synbiotic | 1.37 ± 0.21 | 0.90 ± 0.17 | 1.00 ± 0.13 | 1.07 ± 0.22 |

**Supplementary Table 11: Cortex Immune Cell Marker Gene Expression.** Detailed gene expression analysis of data presented in Supplementary Figure 2. Each value is represented as the fold change of the relative gene expression (relative to *gapdh*) from stressed vs. unstressed controls at the same timepoint. Each value is the mean of n = 6 independent samples +/- SEM.

|              |           | US          | CUS         | CUS+Rest    | CUS+US      |
|--------------|-----------|-------------|-------------|-------------|-------------|
| <i>Tlr4</i>  | Control   | 0.91 ± 0.16 | 1.41 ± 0.19 | 1.48 ± 0.15 | 1.26 ± 0.18 |
|              | BDPP      | 0.97 ± 0.06 | 1.47 ± 0.27 | 1.32 ± 0.13 | 1.26 ± 0.17 |
|              | Probiotic | 0.85 ± 0.20 | 1.41 ± 0.17 | 1.07 ± 0.08 | 1.04 ± 0.19 |
|              | Synbiotic | 1.02 ± 0.16 | 1.42 ± 0.17 | 1.33 ± 0.07 | 0.84 ± 0.18 |
| <i>Nfkb</i>  | Control   | 0.85 ± 0.09 | 0.92 ± 0.14 | 0.88 ± 0.17 | 1.23 ± 0.11 |
|              | BDPP      | 0.84 ± 0.11 | 0.82 ± 0.27 | 0.86 ± 0.26 | 1.29 ± 0.20 |
|              | Probiotic | 0.95 ± 0.20 | 1.30 ± 0.31 | 0.58 ± 0.45 | 0.96 ± 0.11 |
|              | Synbiotic | 0.97 ± 0.20 | 0.80 ± 0.15 | 1.02 ± 0.15 | 0.99 ± 0.16 |
| <i>Casp1</i> | Control   | 1.58 ± 0.24 | 1.40 ± 0.23 | 0.50 ± 0.09 | 1.05 ± 0.15 |
|              | BDPP      | 1.71 ± 0.25 | 1.74 ± 0.24 | 0.66 ± 0.05 | 1.20 ± 0.25 |
|              | Probiotic | 1.38 ± 0.36 | 1.24 ± 0.22 | 0.60 ± 0.16 | 1.07 ± 0.20 |
|              | Synbiotic | 1.06 ± 0.28 | 1.03 ± 0.22 | 0.76 ± 0.19 | 1.63 ± 0.24 |
| <i>Il1b</i>  | Control   | 1.06 ± 0.13 | 2.62 ± 0.30 | 1.50 ± 0.24 | 1.71 ± 0.25 |
|              | BDPP      | 0.73 ± 0.16 | 1.76 ± 0.16 | 1.08 ± 0.34 | 0.90 ± 0.17 |
|              | Probiotic | 1.12 ± 0.16 | 2.66 ± 0.31 | 1.50 ± 0.19 | 0.84 ± 0.14 |
|              | Synbiotic | 1.06 ± 0.18 | 2.68 ± 0.30 | 0.93 ± 0.17 | 1.43 ± 0.30 |
| <i>Ccl2</i>  | Control   | 1.13 ± 0.34 | 1.04 ± 0.19 | 0.61 ± 0.19 | 0.95 ± 0.23 |
|              | BDPP      | 0.76 ± 0.29 | 1.30 ± 0.53 | 0.79 ± 0.20 | 0.68 ± 0.14 |
|              | Probiotic | 1.95 ± 0.26 | 2.11 ± 0.22 | 0.41 ± 0.32 | 1.14 ± 0.11 |
|              | Synbiotic | 1.56 ± 0.22 | 1.98 ± 0.16 | 0.30 ± 0.12 | 1.46 ± 0.16 |
| <i>Ccl5</i>  | Control   | 1.16 ± 0.19 | 1.72 ± 0.22 | 0.70 ± 0.30 | 1.00 ± 0.14 |
|              | BDPP      | 0.72 ± 0.30 | 1.32 ± 0.29 | 0.61 ± 0.13 | 1.31 ± 0.16 |
|              | Probiotic | 0.77 ± 0.18 | 1.50 ± 0.26 | 1.01 ± 0.17 | 0.90 ± 0.30 |
|              | Synbiotic | 1.11 ± 0.16 | 1.43 ± 0.28 | 0.51 ± 0.14 | 1.05 ± 0.18 |
| <i>Icam</i>  | Control   | 0.99 ± 0.06 | 2.33 ± 0.18 | 2.47 ± 0.40 | 1.89 ± 0.17 |
|              | BDPP      | 0.60 ± 0.22 | 1.49 ± 0.15 | 1.98 ± 0.38 | 2.62 ± 0.25 |
|              | Probiotic | 0.87 ± 0.15 | 3.60 ± 0.17 | 1.29 ± 0.34 | 2.18 ± 0.31 |
|              | Synbiotic | 1.68 ± 0.21 | 1.48 ± 0.22 | 0.54 ± 0.14 | 1.58 ± 0.44 |
| <i>Vcam</i>  | Control   | 0.92 ± 0.22 | 0.98 ± 0.25 | 1.19 ± 0.14 | 1.17 ± 0.15 |
|              | BDPP      | 0.83 ± 0.10 | 1.03 ± 0.28 | 1.16 ± 0.10 | 1.22 ± 0.25 |
|              | Probiotic | 0.83 ± 0.02 | 1.55 ± 0.13 | 0.69 ± 0.19 | 1.50 ± 0.31 |
|              | Synbiotic | 0.97 ± 0.09 | 1.83 ± 0.24 | 0.67 ± 0.25 | 1.06 ± 0.21 |

**Supplementary Table 12: Cerebellum Inflammatory Cytokine Expression.** Detailed cytokine expression analysis of data presented in Supplementary Figure 2. Each value represents the fold change of the absolute cytokine expression between the stressed and non-stressed groups. Each value is the mean of n = 6 independent samples +/- SEM.

|       |           | US          | CUS         | CUS+Rest    | CUS+US      |
|-------|-----------|-------------|-------------|-------------|-------------|
| IL-1b | Control   | 0.92 ± 0.08 | 0.95 ± 0.06 | 0.93 ± 0.13 | 0.76 ± 0.14 |
|       | BDPP      | 1.19 ± 0.09 | 1.02 ± 0.21 | 1.23 ± 0.15 | 0.69 ± 0.21 |
|       | Probiotic | 1.07 ± 0.22 | 0.76 ± 0.15 | 0.64 ± 0.21 | 0.82 ± 0.12 |
|       | Synbiotic | 1.39 ± 0.21 | 0.78 ± 0.21 | 0.89 ± 0.22 | 0.88 ± 0.21 |
| IL-6  | Control   | 0.68 ± 0.21 | 0.86 ± 0.14 | 0.83 ± 0.13 | 0.63 ± 0.04 |
|       | BDPP      | 0.78 ± 0.15 | 0.86 ± 0.21 | 1.36 ± 0.41 | 0.72 ± 0.09 |
|       | Probiotic | 1.30 ± 0.22 | 0.96 ± 0.22 | 0.88 ± 0.15 | 0.97 ± 0.20 |
|       | Synbiotic | 1.45 ± 0.21 | 0.84 ± 0.29 | 1.00 ± 0.25 | 1.11 ± 0.25 |
| IL-10 | Control   | 0.80 ± 0.28 | 1.58 ± 0.21 | 0.73 ± 0.14 | 1.01 ± 0.21 |
|       | BDPP      | 0.83 ± 0.19 | 1.30 ± 0.19 | 1.03 ± 0.25 | 0.93 ± 0.14 |
|       | Probiotic | 0.95 ± 0.21 | 0.90 ± 0.17 | 0.70 ± 0.21 | 0.87 ± 0.21 |
|       | Synbiotic | 0.86 ± 0.15 | 1.25 ± 0.21 | 0.93 ± 0.22 | 2.41 ± 0.31 |

**Supplementary Table 13: Cortex Immune Cell Marker Gene Expression.** Detailed gene expression analysis of data presented in Supplementary Figure 2. Each value is represented as the fold change of the relative gene expression (relative to *gapdh*) from stressed vs. unstressed controls at the same timepoint. Each value is the mean of n = 6 independent samples +/- SEM.

|              |           | US          | CUS         | CUS+Rest    | CUS+US      |
|--------------|-----------|-------------|-------------|-------------|-------------|
| <i>Tlr4</i>  | Control   | 0.99 ± 0.17 | 0.85 ± 0.16 | 1.04 ± 0.19 | 0.95 ± 0.15 |
|              | BDPP      | 0.79 ± 0.26 | 0.82 ± 0.17 | 1.11 ± 0.23 | 1.07 ± 0.29 |
|              | Probiotic | 1.46 ± 0.20 | 0.84 ± 0.13 | 0.98 ± 0.29 | 0.81 ± 0.19 |
|              | Synbiotic | 1.26 ± 0.20 | 1.63 ± 0.17 | 0.84 ± 0.27 | 1.02 ± 0.17 |
| <i>Nfkb</i>  | Control   | 0.87 ± 0.15 | 1.31 ± 0.24 | 1.37 ± 0.17 | 1.64 ± 0.18 |
|              | BDPP      | 1.02 ± 0.61 | 1.02 ± 0.15 | 0.83 ± 0.19 | 1.63 ± 0.14 |
|              | Probiotic | 1.05 ± 0.21 | 0.70 ± 0.16 | 0.64 ± 0.32 | 1.34 ± 0.17 |
|              | Synbiotic | 1.25 ± 0.31 | 0.75 ± 0.19 | 0.95 ± 0.21 | 3.70 ± 0.34 |
| <i>Casp1</i> | Control   | 1.17 ± 0.21 | 1.30 ± 0.25 | 1.18 ± 0.13 | 1.05 ± 0.21 |
|              | BDPP      | 0.64 ± 0.12 | 1.21 ± 0.10 | 1.38 ± 0.19 | 0.74 ± 0.19 |
|              | Probiotic | 1.38 ± 0.10 | 1.32 ± 0.09 | 1.40 ± 0.22 | 1.06 ± 0.14 |
|              | Synbiotic | 1.84 ± 0.16 | 1.05 ± 0.24 | 1.39 ± 0.16 | 0.96 ± 0.21 |
| <i>Il1b</i>  | Control   | 0.92 ± 0.22 | 2.63 ± 0.40 | 2.32 ± 0.13 | 1.67 ± 0.16 |
|              | BDPP      | 0.28 ± 0.59 | 1.06 ± 0.32 | 0.82 ± 0.16 | 1.14 ± 0.17 |
|              | Probiotic | 1.25 ± 0.43 | 1.02 ± 0.27 | 0.66 ± 0.12 | 1.29 ± 0.15 |
|              | Synbiotic | 0.86 ± 0.19 | 0.37 ± 0.30 | 0.57 ± 0.15 | 2.49 ± 0.19 |
| <i>Ccl2</i>  | Control   | 0.75 ± 0.20 | 1.81 ± 0.12 | 0.91 ± 0.21 | 0.93 ± 0.20 |
|              | BDPP      | 0.79 ± 0.27 | 1.16 ± 0.22 | 0.80 ± 0.15 | 1.16 ± 0.13 |
|              | Probiotic | 1.26 ± 0.20 | 1.02 ± 0.22 | 1.01 ± 0.20 | 1.39 ± 0.23 |
|              | Synbiotic | 1.03 ± 0.12 | 1.22 ± 0.14 | 1.18 ± 0.17 | 1.01 ± 0.17 |
| <i>Ccl5</i>  | Control   | 0.85 ± 0.29 | 2.07 ± 0.24 | 1.13 ± 0.13 | 1.53 ± 0.15 |
|              | BDPP      | 0.98 ± 0.23 | 1.24 ± 0.17 | 1.10 ± 0.21 | 1.48 ± 0.22 |
|              | Probiotic | 0.72 ± 0.42 | 1.66 ± 0.18 | 0.91 ± 0.11 | 1.18 ± 0.21 |
|              | Synbiotic | 0.78 ± 0.17 | 1.09 ± 0.12 | 1.29 ± 0.14 | 1.51 ± 0.17 |
| <i>Icam</i>  | Control   | 1.28 ± 0.15 | 1.37 ± 0.26 | 2.11 ± 0.16 | 2.67 ± 0.19 |
|              | BDPP      | 0.57 ± 0.18 | 0.60 ± 0.07 | 0.72 ± 0.09 | 1.39 ± 0.12 |
|              | Probiotic | 2.16 ± 0.18 | 0.81 ± 0.20 | 2.02 ± 0.16 | 1.45 ± 0.15 |
|              | Synbiotic | 1.60 ± 0.14 | 0.55 ± 0.06 | 1.80 ± 0.19 | 1.14 ± 0.24 |
| <i>Vcam</i>  | Control   | 1.13 ± 0.20 | 0.90 ± 0.14 | 0.89 ± 0.14 | 1.38 ± 0.14 |
|              | BDPP      | 0.92 ± 0.16 | 0.85 ± 0.15 | 0.54 ± 0.22 | 0.76 ± 0.12 |
|              | Probiotic | 1.71 ± 0.23 | 0.66 ± 0.13 | 0.96 ± 0.20 | 1.07 ± 0.21 |
|              | Synbiotic | 1.67 ± 0.27 | 0.62 ± 0.18 | 1.00 ± 0.14 | 1.44 ± 0.18 |

**Supplementary Table 14: Spleen Immune Cell Marker Gene Expression.** Detailed gene expression analysis of data presented in Supplementary Figure 8. Each value is represented as the fold change of the relative gene expression (relative to *gapdh*) from stressed vs. unstressed controls at the same timepoint. Each value is the mean of n = 6 independent samples +/- SEM, where the SEM was calculated as the geometric mean of the SEM of the two groups used to build the ratio.

|               |           | US          | CUS         | CUS+Rest    | CUS+US      |
|---------------|-----------|-------------|-------------|-------------|-------------|
| <i>Foxp3</i>  | Control   | 1.25 ± 0.21 | 0.84 ± 0.12 | 1.26 ± 0.19 | 1.21 ± 0.13 |
|               | BDPP      | 1.70 ± 0.30 | 0.91 ± 0.08 | 1.32 ± 0.21 | 1.84 ± 0.13 |
|               | Probiotic | 1.01 ± 0.12 | 0.69 ± 0.12 | 0.91 ± 0.16 | 1.15 ± 0.13 |
|               | Synbiotic | 1.22 ± 0.08 | 0.84 ± 0.24 | 0.80 ± 0.21 | 1.94 ± 0.23 |
| <i>Rorc</i>   | Control   | 1.58 ± 0.18 | 3.49 ± 0.35 | 1.83 ± 0.16 | 0.90 ± 0.13 |
|               | BDPP      | 2.01 ± 0.16 | 3.35 ± 0.53 | 1.55 ± 0.23 | 1.83 ± 0.26 |
|               | Probiotic | 0.84 ± 0.17 | 2.75 ± 0.39 | 1.12 ± 0.30 | 0.81 ± 0.16 |
|               | Synbiotic | 1.06 ± 0.17 | 1.96 ± 0.30 | 1.03 ± 0.16 | 0.96 ± 0.41 |
| <i>Gata3</i>  | Control   | 1.49 ± 0.10 | 1.19 ± 0.09 | 1.14 ± 0.22 | 0.82 ± 0.30 |
|               | BDPP      | 1.11 ± 0.15 | 1.16 ± 0.13 | 1.26 ± 0.21 | 1.21 ± 0.16 |
|               | Probiotic | 0.92 ± 0.09 | 1.24 ± 0.08 | 1.34 ± 0.35 | 0.90 ± 0.16 |
|               | Synbiotic | 1.09 ± 0.06 | 1.31 ± 0.10 | 1.16 ± 0.11 | 1.12 ± 0.18 |
| <i>Tbet</i>   | Control   | 0.76 ± 0.22 | 0.94 ± 0.17 | 1.15 ± 0.20 | 0.86 ± 0.12 |
|               | BDPP      | 1.08 ± 0.20 | 1.05 ± 0.09 | 1.94 ± 0.40 | 1.74 ± 0.17 |
|               | Probiotic | 0.84 ± 0.19 | 1.07 ± 0.16 | 0.95 ± 0.17 | 0.73 ± 0.18 |
|               | Synbiotic | 0.72 ± 0.14 | 0.72 ± 0.13 | 1.21 ± 0.29 | 1.11 ± 0.28 |
| <i>Ahr</i>    | Control   | 0.87 ± 0.23 | 0.87 ± 0.11 | 1.24 ± 0.22 | 0.74 ± 0.19 |
|               | BDPP      | 0.83 ± 0.19 | 0.78 ± 0.16 | 1.32 ± 0.18 | 0.81 ± 0.26 |
|               | Probiotic | 0.85 ± 0.17 | 0.73 ± 0.15 | 1.28 ± 0.12 | 0.83 ± 0.15 |
|               | Synbiotic | 0.87 ± 0.13 | 0.72 ± 0.12 | 0.87 ± 0.22 | 0.75 ± 0.17 |
| <i>Cyp1a1</i> | Control   | 1.06 ± 0.23 | 2.00 ± 0.12 | 1.21 ± 0.18 | 2.14 ± 0.21 |
|               | BDPP      | 0.94 ± 0.17 | 1.07 ± 0.19 | 0.94 ± 0.17 | 1.94 ± 0.41 |
|               | Probiotic | 0.70 ± 0.14 | 0.86 ± 0.13 | 1.09 ± 0.19 | 2.29 ± 0.30 |
|               | Synbiotic | 1.08 ± 0.19 | 0.61 ± 0.15 | 1.26 ± 0.13 | 1.27 ± 0.21 |
| <i>Tlr4</i>   | Control   | 0.93 ± 0.11 | 1.20 ± 0.16 | 0.85 ± 0.20 | 0.96 ± 0.17 |
|               | BDPP      | 0.97 ± 0.21 | 1.02 ± 0.14 | 1.11 ± 0.16 | 1.13 ± 0.15 |
|               | Probiotic | 0.86 ± 0.22 | 1.28 ± 0.20 | 0.86 ± 0.24 | 1.08 ± 0.13 |
|               | Synbiotic | 0.94 ± 0.22 | 1.02 ± 0.15 | 0.76 ± 0.25 | 1.07 ± 0.14 |
| <i>Nfkb</i>   | Control   | 0.85 ± 0.11 | 0.95 ± 0.12 | 1.08 ± 0.17 | 0.88 ± 0.11 |
|               | BDPP      | 0.80 ± 0.10 | 0.88 ± 0.11 | 1.23 ± 0.21 | 1.07 ± 0.21 |
|               | Probiotic | 0.78 ± 0.16 | 1.21 ± 0.11 | 0.89 ± 0.16 | 0.82 ± 0.18 |
|               | Synbiotic | 0.78 ± 0.18 | 1.24 ± 0.20 | 0.91 ± 0.16 | 0.91 ± 0.14 |
| <i>Il1b</i>   | Control   | 0.72 ± 0.16 | 1.23 ± 0.14 | 1.44 ± 0.23 | 1.11 ± 0.15 |
|               | BDPP      | 0.77 ± 0.21 | 0.78 ± 0.19 | 0.91 ± 0.22 | 0.74 ± 0.10 |
|               | Probiotic | 0.74 ± 0.18 | 1.55 ± 0.19 | 1.04 ± 0.32 | 0.92 ± 0.13 |
|               | Synbiotic | 1.01 ± 0.26 | 1.47 ± 0.17 | 1.16 ± 0.31 | 0.94 ± 0.16 |
| <i>Ido</i>    | Control   | 0.45 ± 0.37 | 0.80 ± 0.11 | 0.86 ± 0.18 | 0.87 ± 0.18 |
|               | BDPP      | 0.97 ± 0.12 | 1.18 ± 0.21 | 1.63 ± 0.35 | 0.56 ± 0.17 |
|               | Probiotic | 0.71 ± 0.20 | 0.79 ± 0.15 | 0.83 ± 0.44 | 0.51 ± 0.12 |
|               | Synbiotic | 0.68 ± 0.20 | 1.02 ± 0.17 | 0.82 ± 0.87 | 0.51 ± 0.16 |

**Supplementary Table 15: Splenic Inflammatory Cytokine Expression.** Detailed cytokine expression analysis of data presented in Supplementary Figure 8. Each value represents the fold change of the absolute cytokine expression between the stressed and non-stressed groups. Each value is the mean of n = 6 independent samples +/- SEM.

|       |           | US          | CUS         | CUS+Rest    | CUS+US      |
|-------|-----------|-------------|-------------|-------------|-------------|
| IL-1b | Control   | 1.02 ± 0.08 | 1.34 ± 0.15 | 1.52 ± 0.21 | 1.00 ± 0.21 |
|       | BDPP      | 1.02 ± 0.11 | 1.03 ± 0.18 | 1.00 ± 0.13 | 0.47 ± 0.17 |
|       | Probiotic | 0.93 ± 0.12 | 0.79 ± 0.21 | 1.19 ± 0.31 | 0.65 ± 0.13 |
|       | Synbiotic | 1.20 ± 0.31 | 0.52 ± 0.17 | 1.36 ± 0.21 | 0.65 ± 0.14 |
| IL-6  | Control   | 0.87 ± 0.04 | 1.54 ± 0.09 | 1.01 ± 0.21 | 1.04 ± 0.30 |
|       | BDPP      | 0.90 ± 0.10 | 0.99 ± 0.12 | 1.19 ± 0.12 | 0.91 ± 0.13 |
|       | Probiotic | 0.90 ± 0.12 | 0.61 ± 0.10 | 1.18 ± 0.17 | 0.90 ± 0.15 |
|       | Synbiotic | 1.27 ± 0.31 | 0.70 ± 0.07 | 0.97 ± 0.20 | 0.88 ± 0.17 |
| IL-10 | Control   | 0.99 ± 0.12 | 0.78 ± 0.13 | 1.22 ± 0.21 | 0.68 ± 0.13 |
|       | BDPP      | 0.90 ± 0.31 | 0.89 ± 0.19 | 1.28 ± 0.26 | 1.06 ± 0.11 |
|       | Probiotic | 1.40 ± 0.41 | 0.74 ± 0.17 | 0.94 ± 0.17 | 0.96 ± 0.12 |
|       | Synbiotic | 1.36 ± 0.21 | 0.91 ± 0.04 | 0.98 ± 0.21 | 1.36 ± 0.40 |

**Supplementary Table 16: Splenic Inflammatory Cytokine Expression.** Detailed cytokine expression analysis of data presented in Supplementary Figure 8. Each value represents the fold change of the absolute cytokine expression between the stressed and non-stressed groups. Each value is the mean of n = 6 independent samples +/- SEM.

|       |           | US          | CUS         | CUS+Rest    | CUS+US      |
|-------|-----------|-------------|-------------|-------------|-------------|
| IL-1b | Control   | 1.02 ± 0.12 | 1.34 ± 0.13 | 1.52 ± 0.22 | 1.00 ± 0.14 |
|       | BDPP      | 1.02 ± 0.09 | 1.03 ± 0.14 | 1.00 ± 0.16 | 0.47 ± 0.13 |
|       | Probiotic | 0.93 ± 0.08 | 0.79 ± 0.19 | 1.19 ± 0.06 | 0.65 ± 0.07 |
|       | Synbiotic | 1.20 ± 0.11 | 0.52 ± 0.21 | 1.36 ± 0.26 | 0.65 ± 0.12 |
| IL-6  | Control   | 0.87 ± 0.23 | 1.54 ± 0.13 | 1.01 ± 0.17 | 1.04 ± 0.21 |
|       | BDPP      | 0.90 ± 0.27 | 0.99 ± 0.25 | 1.19 ± 0.22 | 0.91 ± 0.14 |
|       | Probiotic | 0.90 ± 0.21 | 0.61 ± 0.18 | 1.18 ± 0.27 | 0.90 ± 0.21 |
|       | Synbiotic | 1.27 ± 0.27 | 0.70 ± 0.20 | 0.97 ± 0.31 | 0.88 ± 0.17 |
| IL-10 | Control   | 0.99 ± 0.13 | 0.78 ± 0.14 | 1.22 ± 0.30 | 0.68 ± 0.13 |
|       | BDPP      | 0.90 ± 0.17 | 0.89 ± 0.13 | 1.18 ± 0.29 | 1.06 ± 0.14 |
|       | Probiotic | 1.40 ± 0.21 | 0.74 ± 0.23 | 0.94 ± 0.08 | 0.96 ± 0.16 |
|       | Synbiotic | 1.36 ± 0.28 | 0.91 ± 0.22 | 0.98 ± 0.09 | 1.36 ± 0.21 |

**Supplementary Table 17: Serum Inflammatory Cytokine Expression.** Detailed cytokine expression analysis of data presented in Supplementary Figure 8. Each value represents the fold change of the absolute cytokine expression between the stressed and non-stressed groups. Each value is the mean of n = 6 independent samples +/- SEM.

|       |           | US          | CUS         | CUS+Rest    | CUS+US      |
|-------|-----------|-------------|-------------|-------------|-------------|
| IL-1b | Control   | 1.10 ± 0.09 | 1.13 ± 0.21 | 1.15 ± 0.21 | 1.69 ± 0.31 |
|       | BDPP      | 1.06 ± 0.12 | 1.10 ± 0.08 | 0.88 ± 0.09 | 0.74 ± 0.21 |
|       | Probiotic | 1.12 ± 0.22 | 1.11 ± 0.11 | 1.08 ± 1.12 | 2.18 ± 0.30 |
|       | Synbiotic | 0.91 ± 0.21 | 0.91 ± 0.22 | 1.13 ± 0.12 | 0.49 ± 0.17 |
| IL-6  | Control   | 1.28 ± 0.21 | 1.25 ± 0.16 | 2.60 ± 0.41 | 2.15 ± 0.21 |
|       | BDPP      | 0.65 ± 0.08 | 0.68 ± 0.11 | 1.12 ± 0.22 | 0.86 ± 0.21 |
|       | Probiotic | 0.28 ± 0.34 | 2.23 ± 0.21 | 2.61 ± 0.18 | 2.44 ± 31   |
|       | Synbiotic | 1.07 ± 0.25 | 0.72 ± 0.18 | 0.52 ± 0.28 | 0.50 ± 0.21 |
| IL-10 | Control   | 1.77 ± 0.21 | 6.04 ± 0.31 | 4.46 ± 0.21 | 5.07 ± 0.31 |
|       | BDPP      | 1.88 ± 0.15 | 3.61 ± 0.22 | 2.39 ± 0.24 | 1.51 ± 0.21 |
|       | Probiotic | 1.32 ± 0.20 | 2.19 ± 0.28 | 0.93 ± 0.09 | 2.67 ± 0.16 |
|       | Synbiotic | 1.62 ± 0.17 | 0.92 ± 0.13 | 0.17 ± 0.22 | 0.46 ± 0.21 |
